# Supplementary material for: A theoretical investigation of the interaction between small Pd particles and 1-butyl-3-methyl imidazolium ionic liquids with Cl−, BF4− and PF6− anions
Source: Royal Society of Chemistry journal article supplement (doi:10.1039/c2cp41065f), 2012-01-01
Supplement: c2cp41065f.pdf [file c2cp41065f.pdf]

## Supporting Information

Page 2-4. The B3LYP optimized gas phase structures of  $[\text{Bmim}^+\cdot\text{Cl}^-]\text{-Pd}$  complex.

Page 5-10. The B3LYP optimized gas phase structures of  $[\text{Bmim}^+\cdot\text{Cl}^-]\text{-Pd}_2$  complex.

Page 11-14. The B3LYP optimized gas phase structures of  $[\text{Bmim}^+\cdot\text{BF}_4^-]\text{-Pd}$  complex.

Page 15-19. The B3LYP optimized gas phase structures of  $[\text{Bmim}^+\cdot\text{BF}_4^-]\text{-Pd}_2$  complex.

Page 20-22. The B3LYP optimized gas phase structures of  $[\text{Bmim}^+\cdot\text{PF}_6^-]\text{-Pd}$  complex.

Page 23-29. The B3LYP optimized gas phase structures of  $[\text{Bmim}^+\cdot\text{PF}_6^-]\text{-Pd}_2$  complex.

Page 30. The B3LYP optimized structures of  $[\text{Bmim}^+\cdot\text{BF}_4^-]$  and  $[\text{Bmim}^+\cdot\text{PF}_6^-]$  ion pair in the corresponding simulated solvents.

Page 31-32. The B3LYP optimized structures of  $[\text{Bmim}^+\cdot\text{BF}_4^-]\text{-Pd}$  and  $[\text{Bmim}^+\cdot\text{BF}_4^-]\text{-Pd}_2$  complex in simulated  $[\text{Bmim}^+\cdot\text{BF}_4^-]$  solvent.

Page 33-34. The B3LYP optimized structures of  $[\text{Bmim}^+\cdot\text{PF}_6^-]\text{-Pd}$  and  $[\text{Bmim}^+\cdot\text{PF}_6^-]\text{-Pd}_2$  complex in simulated  $[\text{Bmim}^+\cdot\text{PF}_6^-]$  solvent.

Page 35-38. Information of solvent effect calculation in Gaussian 03.

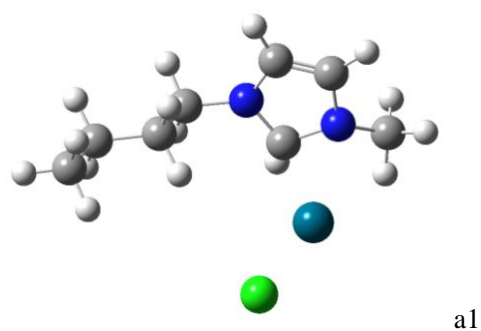

HF=-1010.5065043

Zero-point correction= 0.224596

Cartesian coordinate:

|    |           |           |           |
|----|-----------|-----------|-----------|
| C  | 0.824590  | -0.863568 | 0.786310  |
| N  | -0.133561 | -1.754623 | 0.294160  |
| C  | 0.374394  | -2.371642 | -0.833742 |
| C  | 1.664412  | -2.003017 | -1.008243 |
| N  | 1.995516  | -1.066454 | 0.005575  |
| C  | -1.537061 | -1.743478 | 0.708255  |
| C  | -2.415093 | -0.777477 | -0.099873 |
| C  | -3.863849 | -0.757715 | 0.404622  |
| C  | -4.750832 | 0.195698  | -0.403322 |
| C  | 3.347222  | -1.058941 | 0.589384  |
| Cl | -0.332860 | 2.824150  | 0.047042  |
| H  | -0.241501 | -3.017264 | -1.442802 |
| H  | 2.384229  | -2.281858 | -1.761519 |
| H  | 3.395532  | -0.289944 | 1.360995  |
| H  | 3.588777  | -2.039546 | 1.016850  |
| H  | 4.066954  | -0.812542 | -0.194352 |
| H  | 0.900319  | -0.744351 | 1.866324  |
| H  | -1.553943 | -1.474344 | 1.770492  |
| H  | -1.910828 | -2.771836 | 0.630402  |
| H  | -1.983349 | 0.229268  | -0.048087 |
| H  | -2.394519 | -1.076452 | -1.157490 |
| H  | -4.285082 | -1.773608 | 0.369891  |
| H  | -3.874160 | -0.456136 | 1.461595  |
| H  | -5.776089 | 0.205931  | -0.016733 |
| H  | -4.362885 | 1.219613  | -0.362604 |
| H  | -4.793825 | -0.102166 | -1.458073 |
| Pd | 1.034839  | 0.939197  | -0.125937 |

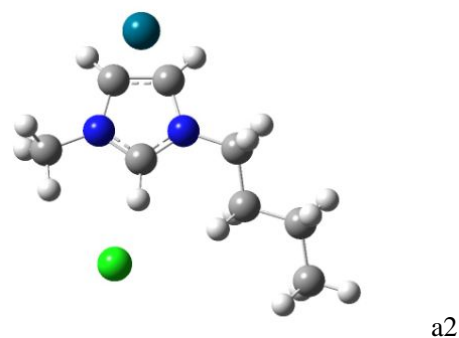

HF=-1010.4798166

Zero-point correction= 0.225271

Cartesian coordinate:

|    |           |           |           |
|----|-----------|-----------|-----------|
| C  | 0.370098  | 0.792933  | 0.406856  |
| N  | 0.273636  | -0.536965 | 0.509813  |
| C  | -1.019484 | -0.880163 | 0.957362  |
| C  | -1.700113 | 0.350081  | 1.152319  |
| N  | -0.776015 | 1.353060  | 0.801010  |
| C  | 1.313498  | -1.489803 | 0.078729  |
| C  | 2.733316  | -0.966454 | 0.310350  |
| C  | 3.787025  | -1.976749 | -0.165641 |
| C  | 5.216236  | -1.474738 | 0.065541  |
| C  | -1.005867 | 2.800916  | 0.790659  |
| Cl | 2.299373  | 2.844617  | -0.813367 |
| H  | -1.161939 | -1.819527 | 1.477992  |
| H  | -2.487455 | 0.581128  | 1.859784  |
| H  | -0.103559 | 3.274432  | 0.387583  |
| H  | -1.863052 | 3.027598  | 0.151543  |
| H  | -1.200746 | 3.150952  | 1.808673  |
| H  | 1.214950  | 1.407302  | -0.012131 |
| H  | 1.150282  | -1.713520 | -0.982123 |
| H  | 1.139945  | -2.413966 | 0.641105  |
| H  | 2.876509  | -0.013315 | -0.215405 |
| H  | 2.869255  | -0.761448 | 1.380746  |
| H  | 3.643722  | -2.937164 | 0.351115  |
| H  | 3.639437  | -2.176423 | -1.236151 |
| H  | 5.952173  | -2.201772 | -0.295223 |
| H  | 5.388631  | -0.528146 | -0.458342 |
| H  | 5.408204  | -1.304261 | 1.131677  |
| Pd | -2.613202 | -0.708243 | -0.498183 |

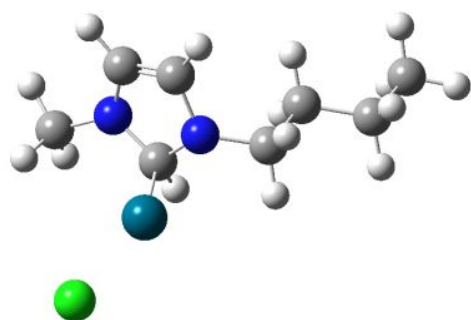

a3

HF= -1010.5054663

Cartesian coordinate:

|    |           |           |           |
|----|-----------|-----------|-----------|
| C  | -0.058990 | 0.685425  | -0.585896 |
| N  | 0.693970  | 0.204896  | 0.518188  |
| C  | 0.778556  | 1.267118  | 1.457813  |
| C  | 0.143035  | 2.341173  | 0.938221  |
| N  | -0.294313 | 2.043755  | -0.341538 |
| C  | 1.806095  | -0.762726 | 0.367575  |
| C  | 3.117563  | -0.124090 | -0.103037 |
| C  | 4.244278  | -1.158534 | -0.236293 |
| C  | 5.564068  | -0.540532 | -0.709778 |
| C  | -1.272245 | 2.808633  | -1.099537 |
| Cl | -3.504386 | -1.169436 | -0.471881 |
| H  | 1.260714  | 1.125498  | 2.412222  |
| H  | -0.060108 | 3.302118  | 1.387993  |
| H  | -2.293056 | 2.488566  | -0.859169 |
| H  | -1.149685 | 3.869926  | -0.870373 |
| H  | -1.099617 | 2.658835  | -2.169270 |
| H  | 0.204599  | 0.389024  | -1.600247 |
| H  | 1.466405  | -1.529732 | -0.333246 |
| H  | 1.932704  | -1.249309 | 1.340459  |
| H  | 2.952877  | 0.369764  | -1.070774 |
| H  | 3.415874  | 0.662441  | 0.602668  |
| H  | 4.398011  | -1.654987 | 0.731990  |
| H  | 3.934713  | -1.945431 | -0.937900 |
| H  | 6.347708  | -1.301048 | -0.794711 |
| H  | 5.450520  | -0.067120 | -1.692418 |
| H  | 5.917092  | 0.226313  | -0.009742 |
| Pd | -1.344260 | -0.658778 | 0.227686  |

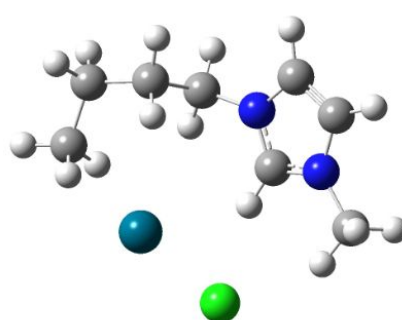

a4

HF=-1010.4897019

Cartesian coordinate:

|    |           |           |           |
|----|-----------|-----------|-----------|
| C  | -1.666072 | 0.013631  | 0.357420  |
| N  | -1.546243 | 1.344842  | 0.449989  |
| C  | -2.735496 | 1.928512  | 0.046827  |
| C  | -3.584908 | 0.915095  | -0.287187 |
| N  | -2.895566 | -0.270751 | -0.089920 |
| C  | -0.272707 | 2.016315  | 0.774733  |
| C  | 0.456993  | 2.507295  | -0.485574 |
| C  | 1.962159  | 2.730876  | -0.246731 |
| C  | 2.771004  | 1.428190  | -0.138102 |
| C  | -3.379978 | -1.635142 | -0.331190 |
| Cl | 0.137466  | -2.732134 | 0.094257  |
| H  | -2.873936 | 2.998172  | 0.034670  |
| H  | -4.603994 | 0.934038  | -0.640337 |
| H  | -2.520814 | -2.308998 | -0.259278 |
| H  | -4.135577 | -1.898435 | 0.413727  |
| H  | -3.810883 | -1.689962 | -1.333468 |
| H  | -0.871987 | -0.720051 | 0.536065  |
| H  | 0.329883  | 1.260248  | 1.286810  |
| H  | -0.490131 | 2.833578  | 1.469821  |
| H  | 0.338825  | 1.746081  | -1.266195 |
| H  | -0.012346 | 3.431729  | -0.847196 |
| H  | 2.352709  | 3.321946  | -1.084662 |
| H  | 2.113021  | 3.345237  | 0.652876  |
| H  | 3.843754  | 1.627261  | -0.049628 |
| H  | 2.502763  | 0.844102  | 0.776939  |
| H  | 2.636499  | 0.811319  | -1.050451 |
| Pd | 1.579391  | -0.805157 | -0.019646 |

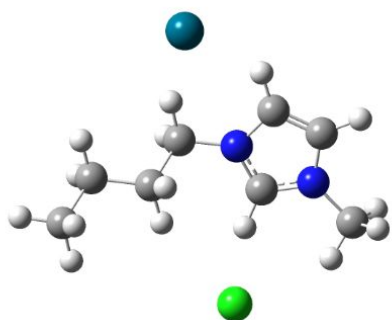

a5

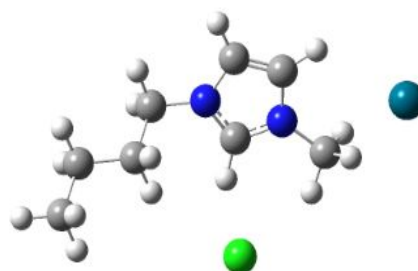

a6

HF= -1010.4539754

Cartesian coordinate:

|    |           |           |           |
|----|-----------|-----------|-----------|
| C  | -1.809147 | -0.797934 | -0.280299 |
| N  | -0.480168 | -0.619941 | -0.292627 |
| C  | 0.138036  | -1.795162 | 0.105878  |
| C  | -0.851687 | -2.696400 | 0.366397  |
| N  | -2.053638 | -2.051284 | 0.122483  |
| C  | 0.173352  | 0.653103  | -0.644844 |
| C  | -0.343199 | 1.829186  | 0.186455  |
| C  | 0.350554  | 3.142382  | -0.198691 |
| C  | -0.154286 | 4.330500  | 0.626871  |
| C  | -3.412370 | -2.581305 | 0.294975  |
| Cl | -4.314847 | 0.950488  | -0.176569 |
| H  | 1.223723  | -1.872741 | 0.164577  |
| H  | -0.804855 | -3.720287 | 0.702658  |
| H  | -4.104854 | -1.736627 | 0.202991  |
| H  | -3.618643 | -3.331614 | -0.472896 |
| H  | -3.498920 | -3.031340 | 1.286751  |
| H  | -2.625963 | -0.045097 | -0.449807 |
| H  | 0.028909  | 0.828649  | -1.715625 |
| H  | 1.265239  | 0.499411  | -0.477939 |
| H  | -1.429524 | 1.924071  | 0.048772  |
| H  | -0.174534 | 1.612515  | 1.249672  |
| H  | 1.438308  | 3.036078  | -0.069485 |
| H  | 0.182658  | 3.341966  | -1.266154 |
| H  | 0.346694  | 5.257928  | 0.328558  |
| H  | -1.232804 | 4.469797  | 0.494092  |
| H  | 0.032878  | 4.177390  | 1.696517  |
| Pd | 3.032896  | -0.464697 | -0.005880 |

HF=- 1010.4531344

Cartesian coordinate:

|    |           |           |           |
|----|-----------|-----------|-----------|
| C  | 0.875472  | -0.011358 | -0.496560 |
| N  | 1.506113  | -1.194571 | -0.474653 |
| C  | 0.578895  | -2.195770 | -0.225757 |
| C  | -0.635570 | -1.589607 | -0.093072 |
| N  | -0.424299 | -0.232769 | -0.262195 |
| C  | 2.960633  | -1.353143 | -0.668287 |
| C  | 3.773634  | -0.488785 | 0.301496  |
| C  | 5.282855  | -0.634398 | 0.062864  |
| C  | 6.109546  | 0.224504  | 1.025696  |
| C  | -1.416801 | 0.842496  | -0.170655 |
| Cl | 1.328295  | 3.013392  | -0.285919 |
| H  | 0.860283  | -3.235397 | -0.165772 |
| H  | -1.622094 | -1.983340 | 0.107795  |
| H  | -0.877836 | 1.802215  | -0.208907 |
| H  | -2.113589 | 0.782125  | -1.024819 |
| H  | -1.931252 | 0.779050  | 0.811197  |
| H  | 1.291670  | 1.021250  | -0.596865 |
| H  | 3.192243  | -1.095851 | -1.707192 |
| H  | 3.180272  | -2.416265 | -0.531901 |
| H  | 3.480750  | 0.563321  | 0.189099  |
| H  | 3.525705  | -0.779028 | 1.331170  |
| H  | 5.574579  | -1.689829 | 0.165642  |
| H  | 5.515043  | -0.348590 | -0.972429 |
| H  | 7.181678  | 0.112309  | 0.831053  |
| H  | 5.856413  | 1.285469  | 0.921691  |
| H  | 5.926620  | -0.061250 | 2.068499  |
| Pd | -3.790569 | -0.102959 | 0.225781  |

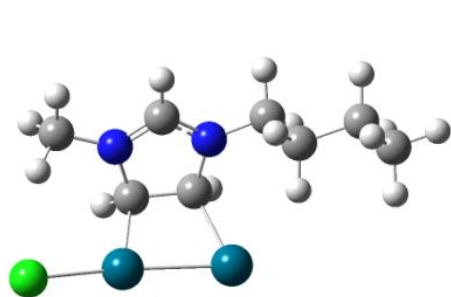

b1

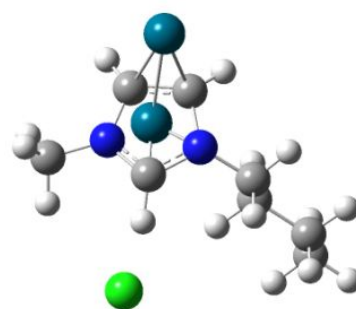

b2

HF= -1137.2692609

Zero-point correction= 0.225783

Cartesian coordinate:

|    |           |           |           |
|----|-----------|-----------|-----------|
| C  | 0.435350  | 2.310584  | -0.284536 |
| N  | 1.221906  | 1.360302  | -0.770819 |
| C  | 0.403411  | 0.301806  | -1.358779 |
| C  | -0.991778 | 0.752985  | -1.098484 |
| N  | -0.848472 | 2.061907  | -0.484820 |
| C  | 2.681787  | 1.341374  | -0.669969 |
| C  | 3.207929  | 0.632530  | 0.584497  |
| C  | 4.739649  | 0.554936  | 0.608753  |
| C  | 5.274593  | -0.150231 | 1.859723  |
| C  | -1.965439 | 2.917225  | -0.095909 |
| Cl | -3.780351 | 0.174882  | 1.259377  |
| H  | 0.690145  | 0.103330  | -2.399908 |
| H  | -1.712489 | 0.739820  | -1.919420 |
| H  | -2.658615 | 2.335784  | 0.523353  |
| H  | -1.583110 | 3.777293  | 0.459030  |
| H  | -2.486568 | 3.267763  | -0.993088 |
| H  | 0.800692  | 3.181368  | 0.245805  |
| H  | 3.032825  | 2.379623  | -0.702681 |
| H  | 3.052896  | 0.844395  | -1.573016 |
| H  | 2.843784  | 1.160969  | 1.476387  |
| H  | 2.770535  | -0.375739 | 0.619690  |
| H  | 5.090564  | 0.025288  | -0.288283 |
| H  | 5.161699  | 1.568738  | 0.550835  |
| H  | 6.369000  | -0.195133 | 1.850649  |
| H  | 4.968660  | 0.374650  | 2.772524  |
| H  | 4.897628  | -1.177787 | 1.925496  |
| Pd | -1.733023 | -0.567285 | 0.240236  |
| Pd | 0.596094  | -1.539369 | -0.510651 |

HF=-1137.209471

Zero-point correction= 0.224076

Cartesian coordinate:

|    |           |           |           |
|----|-----------|-----------|-----------|
| C  | 0.380238  | -0.875068 | -1.069050 |
| C  | 0.736330  | 0.282079  | -1.804573 |
| N  | 0.164347  | 1.371911  | -1.156474 |
| C  | -0.468073 | 0.971001  | -0.028971 |
| N  | -0.401594 | -0.404523 | 0.047926  |
| H  | 0.171433  | -1.868100 | -1.450456 |
| H  | 1.036100  | 0.364269  | -2.839828 |
| C  | 0.214008  | 2.770764  | -1.573841 |
| H  | -0.711131 | 3.245818  | -1.228717 |
| H  | 1.089860  | 3.271141  | -1.148387 |
| H  | 0.265740  | 2.809304  | -2.664437 |
| H  | -1.277798 | 1.589921  | 0.422481  |
| C  | -1.536004 | -1.197552 | 0.605885  |
| H  | -1.812591 | -0.721488 | 1.549236  |
| C  | -2.738035 | -1.236263 | -0.343070 |
| H  | -1.143516 | -2.194419 | 0.828312  |
| C  | -3.906478 | -2.023842 | 0.267109  |
| H  | -3.054804 | -0.203408 | -0.541347 |
| H  | -2.443081 | -1.692438 | -1.299095 |
| C  | -5.127517 | -2.059064 | -0.657996 |
| H  | -3.586952 | -3.050461 | 0.499852  |
| H  | -4.188703 | -1.559629 | 1.221523  |
| H  | -5.952691 | -2.615625 | -0.199969 |
| H  | -5.481678 | -1.044900 | -0.872789 |
| H  | -4.888657 | -2.541777 | -1.613850 |
| Pd | 2.448080  | -0.738055 | -0.695405 |
| Pd | 1.035169  | 0.223674  | 1.643596  |
| Cl | -3.053944 | 2.547604  | 0.065151  |

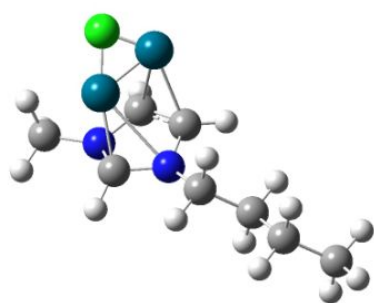

b3

*HF* = -1137.2617027

*Zero-point correction* = 0.224328

*Cartesian coordinate:*

|    |           |           |           |
|----|-----------|-----------|-----------|
| C  | -0.710271 | 1.386362  | 0.797608  |
| C  | 0.469944  | 1.449894  | 1.577278  |
| N  | 0.735399  | 0.139782  | 2.009512  |
| C  | -0.081053 | -0.737526 | 1.306139  |
| N  | -1.108488 | 0.037692  | 0.783333  |
| H  | -1.456766 | 2.159345  | 0.670835  |
| H  | 0.825750  | 2.278126  | 2.178619  |
| C  | 1.979263  | -0.253066 | 2.651492  |
| H  | 1.863589  | -1.250037 | 3.084913  |
| H  | 2.808523  | -0.265930 | 1.935801  |
| H  | 2.201337  | 0.456107  | 3.454716  |
| H  | -0.339647 | -1.706232 | 1.774734  |
| C  | -2.175807 | -0.500633 | -0.060567 |
| H  | -2.215204 | -1.579308 | 0.125167  |
| C  | -3.541701 | 0.130977  | 0.229428  |
| H  | -1.900636 | -0.365755 | -1.114279 |
| C  | -4.653116 | -0.492038 | -0.626877 |
| H  | -3.776656 | 0.011068  | 1.295596  |
| H  | -3.502460 | 1.211059  | 0.034314  |
| C  | -6.026802 | 0.134335  | -0.366131 |
| H  | -4.395927 | -0.383974 | -1.689521 |
| H  | -4.699596 | -1.572677 | -0.431523 |
| H  | -6.798405 | -0.330959 | -0.989167 |
| H  | -6.326112 | 0.013477  | 0.682109  |
| H  | -6.021551 | 1.208272  | -0.588548 |
| Pd | 0.998047  | 1.690743  | -0.512773 |
| Pd | 0.966185  | -1.766197 | -0.191678 |
| Cl | 2.025172  | -0.256697 | -1.801128 |

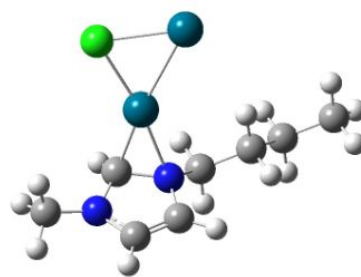

b4

*HF* = - 1137.2546635

*Cartesian coordinate:*

|    |           |           |           |
|----|-----------|-----------|-----------|
| C  | 0.000000  | 0.000000  | 0.000000  |
| N  | 0.000000  | 0.000000  | 1.340665  |
| C  | 1.310483  | 0.000000  | 1.792281  |
| C  | 2.111241  | -0.002764 | 0.689105  |
| N  | 1.273152  | -0.007396 | -0.413342 |
| C  | -1.229362 | -0.044543 | 2.157080  |
| C  | -2.099473 | -1.261747 | 1.826481  |
| C  | -3.399821 | -1.267498 | 2.641228  |
| C  | -4.280241 | -2.479496 | 2.319948  |
| C  | 1.650982  | -0.055658 | -1.831526 |
| Cl | -1.900825 | -0.814079 | -2.249060 |
| H  | 1.555215  | 0.001338  | 2.842886  |
| H  | 3.185940  | -0.005877 | 0.595630  |
| H  | 0.741570  | -0.276263 | -2.402538 |
| H  | 2.073064  | 0.905472  | -2.136750 |
| H  | 2.387976  | -0.848479 | -1.978502 |
| H  | -0.865884 | -0.108197 | -0.705871 |
| H  | -1.779565 | 0.885943  | 1.983425  |
| H  | -0.910073 | -0.052195 | 3.203610  |
| H  | -2.333415 | -1.262911 | 0.753201  |
| H  | -1.524830 | -2.175626 | 2.028607  |
| H  | -3.166767 | -1.253845 | 3.716205  |
| H  | -3.960055 | -0.345258 | 2.434259  |
| H  | -5.207897 | -2.457607 | 2.902225  |
| H  | -4.547260 | -2.498748 | 1.257653  |
| H  | -3.762095 | -3.418094 | 2.550660  |
| Pd | -0.550884 | -0.774235 | -4.064635 |
| Pd | 1.656585  | -1.959953 | -3.918857 |

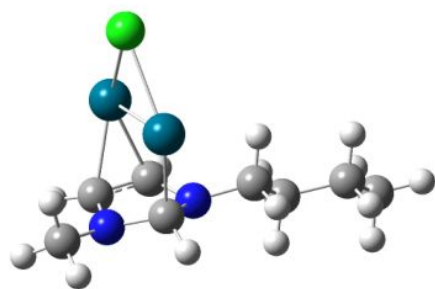

b5

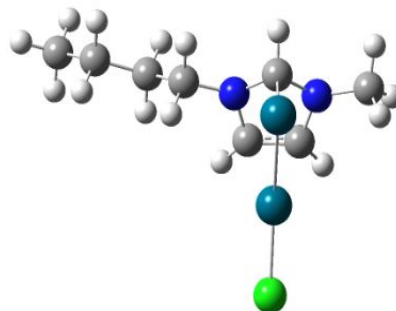

b6

$HF=-1137.2615505$

*Cartesian coordinate:*

|    |           |           |           |
|----|-----------|-----------|-----------|
| C  | 0.807215  | 0.936090  | 1.231940  |
| C  | -0.339173 | 1.750515  | 1.290360  |
| N  | -0.554219 | 2.263693  | 0.017686  |
| C  | 0.211236  | 1.471100  | -0.903072 |
| N  | 1.272111  | 0.962439  | -0.078638 |
| H  | 1.464425  | 0.668030  | 2.047630  |
| H  | -0.759361 | 2.244459  | 2.157189  |
| C  | -1.791438 | 2.916370  | -0.376633 |
| H  | -1.621987 | 3.477823  | -1.299367 |
| H  | -2.594650 | 2.187219  | -0.542612 |
| H  | -2.088511 | 3.617124  | 0.408755  |
| H  | 0.548568  | 2.009843  | -1.791754 |
| C  | 2.276160  | 0.039093  | -0.608968 |
| H  | 2.412738  | 0.299098  | -1.663778 |
| C  | 3.616630  | 0.132882  | 0.126537  |
| H  | 1.883685  | -0.986958 | -0.577938 |
| C  | 4.676105  | -0.789230 | -0.493232 |
| H  | 3.967279  | 1.173446  | 0.108227  |
| H  | 3.484134  | -0.137279 | 1.183279  |
| C  | 6.021690  | -0.723804 | 0.236427  |
| H  | 4.305169  | -1.823272 | -0.488053 |
| H  | 4.817773  | -0.519854 | -1.549241 |
| H  | 6.756876  | -1.389083 | -0.229320 |
| H  | 6.433574  | 0.292622  | 0.220225  |
| H  | 5.918752  | -1.024110 | 1.286280  |
| Pd | -1.003680 | -0.406949 | 1.307736  |
| Pd | -1.042625 | -0.279650 | -1.335858 |
| Cl | -2.276131 | -2.087445 | -0.033495 |

$HF=-1137.2302613$

$S=3$

*Cartesian coordinate:*

|    |           |           |           |
|----|-----------|-----------|-----------|
| C  | -0.483189 | 0.678824  | 1.164687  |
| C  | 0.643812  | 0.196143  | 1.836752  |
| N  | 0.583813  | -1.191548 | 1.810486  |
| C  | -0.363705 | -1.554713 | 0.817694  |
| N  | -1.214101 | -0.421611 | 0.731699  |
| H  | -0.915697 | 1.666703  | 1.214545  |
| H  | 1.290566  | 0.719800  | 2.526010  |
| C  | 1.693787  | -2.046733 | 2.198825  |
| H  | 1.334979  | -3.073429 | 2.306631  |
| H  | 2.500461  | -2.022468 | 1.455422  |
| H  | 2.080012  | -1.707403 | 3.163787  |
| H  | -0.859856 | -2.518284 | 0.957611  |
| C  | -2.354361 | -0.344980 | -0.183537 |
| H  | -2.662077 | -1.375042 | -0.390826 |
| C  | -3.528722 | 0.446378  | 0.401852  |
| H  | -2.027459 | 0.094237  | -1.136275 |
| C  | -4.732085 | 0.475170  | -0.550962 |
| H  | -3.819523 | 0.001675  | 1.362764  |
| H  | -3.214223 | 1.477175  | 0.613433  |
| C  | -5.911942 | 1.276979  | 0.007967  |
| H  | -4.422056 | 0.902115  | -1.514612 |
| H  | -5.054091 | -0.554641 | -0.760600 |
| H  | -6.755343 | 1.277280  | -0.690941 |
| H  | -6.264637 | 0.855774  | 0.957183  |
| H  | -5.630310 | 2.320815  | 0.191136  |
| Pd | 1.329668  | 0.926336  | -0.262201 |
| Pd | 0.656824  | -1.684169 | -1.022473 |
| Cl | 2.215945  | 3.136806  | -0.183251 |

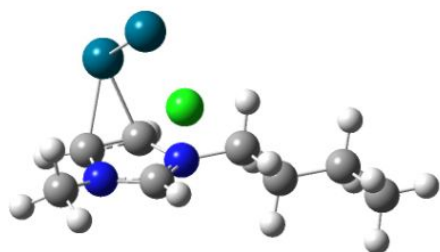

b7

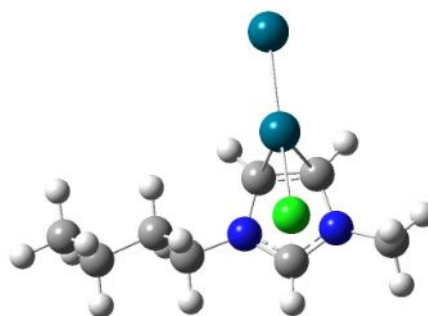

b8

$HF=-1137.2388897$

*Cartesian coordinate:*

|    |           |           |           |
|----|-----------|-----------|-----------|
| C  | -0.194550 | -2.192943 | -0.283961 |
| C  | -1.111510 | -2.095405 | 0.786698  |
| N  | -0.441161 | -1.392782 | 1.806149  |
| C  | 0.762666  | -1.023395 | 1.355970  |
| N  | 0.978295  | -1.537429 | 0.142677  |
| H  | -0.121007 | -2.954467 | -1.049628 |
| H  | -1.922557 | -2.761395 | 1.051379  |
| C  | -1.084945 | -0.832963 | 2.991266  |
| H  | -0.319139 | -0.542426 | 3.711550  |
| H  | -1.665592 | 0.048560  | 2.704819  |
| H  | -1.735109 | -1.590446 | 3.435378  |
| H  | 1.412105  | -0.331458 | 1.865591  |
| C  | 2.100314  | -1.217093 | -0.756637 |
| H  | 1.699790  | -0.555892 | -1.533604 |
| C  | 3.281953  | -0.551567 | -0.053859 |
| H  | 2.405254  | -2.157075 | -1.231473 |
| C  | 4.441155  | -0.303297 | -1.030713 |
| H  | 2.954838  | 0.406121  | 0.369986  |
| H  | 3.629540  | -1.185877 | 0.774037  |
| C  | 5.631966  | 0.389732  | -0.360786 |
| H  | 4.766837  | -1.258300 | -1.466931 |
| H  | 4.082131  | 0.313490  | -1.865439 |
| H  | 6.442585  | 0.558829  | -1.077797 |
| H  | 5.340328  | 1.362349  | 0.051678  |
| H  | 6.033769  | -0.215635 | 0.460971  |
| Pd | -1.788903 | -0.793156 | -0.851053 |
| Pd | -1.064718 | 1.705892  | -0.395897 |
| Cl | 0.678857  | 2.138284  | 1.272324  |

$HF=-1137.2253017$

$S=3$

*Cartesian coordinate:*

|    |           |           |           |
|----|-----------|-----------|-----------|
| C  | 0.000000  | 0.000000  | 0.000000  |
| N  | 0.000000  | 0.000000  | 1.337290  |
| C  | 1.327104  | 0.000000  | 1.779040  |
| C  | 2.126365  | 0.092103  | 0.631877  |
| N  | 1.249893  | 0.157652  | -0.456152 |
| C  | -1.179640 | -0.217217 | 2.188051  |
| C  | -1.249019 | -1.635777 | 2.765384  |
| C  | -2.532168 | -1.849886 | 3.579437  |
| C  | -2.607596 | -3.254716 | 4.187142  |
| C  | 1.643238  | -0.065738 | -1.845464 |
| Cl | 0.620534  | -3.025121 | -0.221160 |
| H  | 1.570520  | 0.224320  | 2.805788  |
| H  | 3.152131  | 0.414158  | 0.534060  |
| H  | 1.707760  | -1.145790 | -2.014904 |
| H  | 0.897012  | 0.378812  | -2.507486 |
| H  | 2.608799  | 0.412486  | -2.019485 |
| H  | -0.871008 | -0.139916 | -0.619734 |
| H  | -2.056847 | -0.003946 | 1.568938  |
| H  | -1.151463 | 0.535436  | 2.984344  |
| H  | -1.179468 | -2.357064 | 1.942987  |
| H  | -0.369919 | -1.809314 | 3.399389  |
| H  | -2.594415 | -1.099134 | 4.380898  |
| H  | -3.406674 | -1.683450 | 2.933944  |
| H  | -3.534185 | -3.389678 | 4.755942  |
| H  | -2.574863 | -4.023303 | 3.406644  |
| H  | -1.766752 | -3.436514 | 4.866759  |
| Pd | 2.315344  | -2.047410 | 1.379065  |
| Pd | 4.280055  | -1.702321 | 3.027810  |



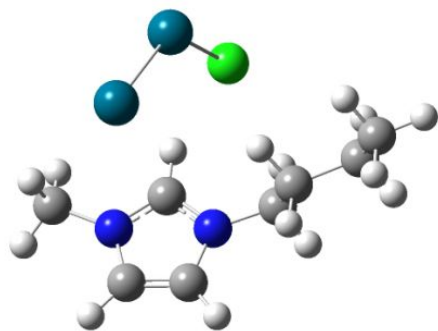

b9

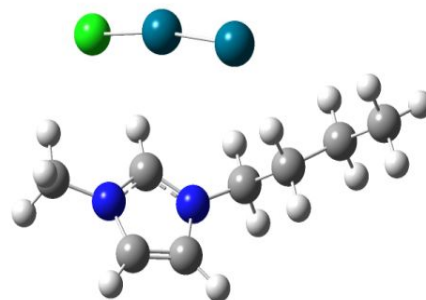

b10

HF=-1137.2243095 S=3

Cartesian coordinate:

|    |           |           |           |
|----|-----------|-----------|-----------|
| C  | 0.000000  | 0.000000  | 0.000000  |
| N  | 0.000000  | 0.000000  | 1.338926  |
| C  | 1.310343  | 0.000000  | 1.782496  |
| C  | 2.108510  | 0.020384  | 0.677745  |
| N  | 1.271609  | 0.037748  | -0.425062 |
| C  | -1.218335 | -0.095576 | 2.171170  |
| C  | -1.384229 | -1.487427 | 2.787867  |
| C  | -2.692417 | -1.595076 | 3.583078  |
| C  | -2.884442 | -2.981331 | 4.206733  |
| C  | 1.679372  | -0.082003 | -1.824745 |
| Cl | -3.158122 | -0.238163 | -0.943179 |
| H  | 1.559289  | -0.003302 | 2.831767  |
| H  | 3.182615  | 0.032811  | 0.580466  |
| H  | 0.883820  | 0.310252  | -2.459154 |
| H  | 2.593121  | 0.494172  | -1.982931 |
| H  | 1.841453  | -1.137676 | -2.065973 |
| H  | -0.901939 | -0.001792 | -0.610952 |
| H  | -2.057877 | 0.129848  | 1.507610  |
| H  | -1.151629 | 0.683425  | 2.938287  |
| H  | -1.379553 | -2.227671 | 1.977111  |
| H  | -0.529245 | -1.714380 | 3.441025  |
| H  | -2.709782 | -0.829609 | 4.372620  |
| H  | -3.533540 | -1.373384 | 2.913829  |
| H  | -3.826569 | -3.035272 | 4.763026  |
| H  | -2.906455 | -3.759086 | 3.434663  |
| H  | -2.070997 | -3.222746 | 4.902271  |
| Pd | -2.279479 | -2.483409 | -1.360017 |
| Pd | 0.010411  | -3.417944 | -0.711381 |

HF=-1137.130968

Cartesian coordinate:

|    |           |           |           |
|----|-----------|-----------|-----------|
| C  | 0.000000  | 0.000000  | 0.000000  |
| N  | 0.000000  | 0.000000  | 1.340665  |
| C  | 1.310483  | 0.000000  | 1.792281  |
| C  | 2.111241  | -0.002764 | 0.689105  |
| N  | 1.273152  | -0.007396 | -0.413342 |
| C  | -1.229362 | -0.044543 | 2.157080  |
| C  | -2.099473 | -1.261747 | 1.826481  |
| C  | -3.399821 | -1.267498 | 2.641228  |
| C  | -4.280241 | -2.479496 | 2.319948  |
| C  | 1.650982  | -0.055658 | -1.831526 |
| Cl | -1.900825 | -0.814079 | -2.249060 |
| H  | 1.555215  | 0.001338  | 2.842886  |
| H  | 3.185940  | -0.005877 | 0.595630  |
| H  | 0.741570  | -0.276263 | -2.402538 |
| H  | 2.073064  | 0.905472  | -2.136750 |
| H  | 2.387976  | -0.848479 | -1.978502 |
| H  | -0.865884 | -0.108197 | -0.705871 |
| H  | -1.779565 | 0.885943  | 1.983425  |
| H  | -0.910073 | -0.052195 | 3.203610  |
| H  | -2.333415 | -1.262911 | 0.753201  |
| H  | -1.524830 | -2.175626 | 2.028607  |
| H  | -3.166767 | -1.253845 | 3.716205  |
| H  | -3.960055 | -0.345258 | 2.434259  |
| H  | -5.207897 | -2.457607 | 2.902225  |
| H  | -4.547260 | -2.498748 | 1.257653  |
| H  | -3.762095 | -3.418094 | 2.550660  |
| Pd | -3.236096 | -1.859298 | -0.775062 |
| Pd | -4.987695 | -3.292858 | 0.355294  |

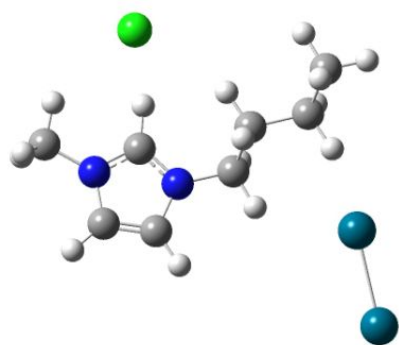

b11

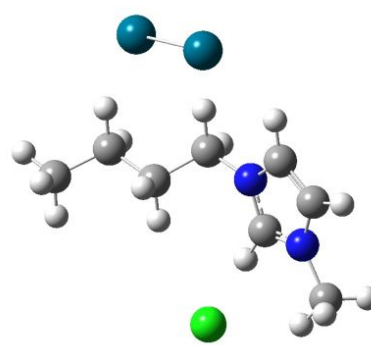

b12

HF=-1137.191115

S=3

*Cartesian coordinate:*

|    |           |           |           |
|----|-----------|-----------|-----------|
| C  | 0.000000  | 0.000000  | 0.000000  |
| N  | 0.000000  | 0.000000  | 1.340665  |
| C  | 1.310483  | 0.000000  | 1.792281  |
| C  | 2.111241  | -0.002764 | 0.689105  |
| N  | 1.273152  | -0.007396 | -0.413342 |
| C  | -1.229362 | -0.044543 | 2.157080  |
| C  | -2.099473 | -1.261747 | 1.826481  |
| C  | -3.399821 | -1.267498 | 2.641228  |
| C  | -4.280241 | -2.479496 | 2.319948  |
| C  | 1.650982  | -0.055658 | -1.831526 |
| Cl | -1.900825 | -0.814079 | -2.249060 |
| H  | 1.555215  | 0.001338  | 2.842886  |
| H  | 3.185940  | -0.005877 | 0.595630  |
| H  | 0.741570  | -0.276263 | -2.402538 |
| H  | 2.073064  | 0.905472  | -2.136750 |
| H  | 2.387976  | -0.848479 | -1.978502 |
| H  | -0.865884 | -0.108197 | -0.705871 |
| H  | -1.779565 | 0.885943  | 1.983425  |
| H  | -0.910073 | -0.052195 | 3.203610  |
| H  | -2.333415 | -1.262911 | 0.753201  |
| H  | -1.524830 | -2.175626 | 2.028607  |
| H  | -3.166767 | -1.253845 | 3.716205  |
| H  | -3.960055 | -0.345258 | 2.434259  |
| H  | -5.207897 | -2.457607 | 2.902225  |
| H  | -4.547260 | -2.498748 | 1.257653  |
| H  | -3.762095 | -3.418094 | 2.550660  |
| Pd | 0.724771  | 0.116984  | 4.521848  |
| Pd | -1.568229 | -1.027168 | 4.716709  |

HF=-1137.1905779

*Cartesian coordinate:*

|    |           |           |           |
|----|-----------|-----------|-----------|
| C  | 0.000000  | 0.000000  | 0.000000  |
| N  | 0.000000  | 0.000000  | 1.340665  |
| C  | 1.310483  | 0.000000  | 1.792281  |
| C  | 2.111241  | -0.002764 | 0.689105  |
| N  | 1.273152  | -0.007396 | -0.413342 |
| C  | -1.229362 | -0.044543 | 2.157080  |
| C  | -2.099473 | -1.261747 | 1.826481  |
| C  | -3.399821 | -1.267498 | 2.641228  |
| C  | -4.280241 | -2.479496 | 2.319948  |
| C  | 1.650982  | -0.055658 | -1.831526 |
| Cl | -1.900825 | -0.814079 | -2.249060 |
| H  | 1.555215  | 0.001338  | 2.842886  |
| H  | 3.185940  | -0.005877 | 0.595630  |
| H  | 0.741570  | -0.276263 | -2.402538 |
| H  | 2.073064  | 0.905472  | -2.136750 |
| H  | 2.387976  | -0.848479 | -1.978502 |
| H  | -0.865884 | -0.108197 | -0.705871 |
| H  | -1.779565 | 0.885943  | 1.983425  |
| H  | -0.910073 | -0.052195 | 3.203610  |
| H  | -2.333415 | -1.262911 | 0.753201  |
| H  | -1.524830 | -2.175626 | 2.028607  |
| H  | -3.166767 | -1.253845 | 3.716205  |
| H  | -3.960055 | -0.345258 | 2.434259  |
| H  | -5.207897 | -2.457607 | 2.902225  |
| H  | -4.547260 | -2.498748 | 1.257653  |
| H  | -3.762095 | -3.418094 | 2.550660  |
| Pd | 0.724771  | 0.116984  | 4.521848  |
| Pd | -1.568229 | -1.027168 | 4.716709  |

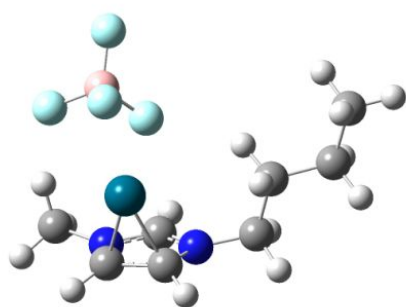

c1

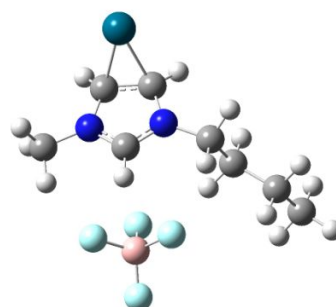

c2

HF=-974.8521801

Zero-point correction= 0.239798

Cartesian coordinate:

|    |           |           |           |
|----|-----------|-----------|-----------|
| C  | -0.013923 | -1.585426 | 1.527132  |
| N  | -0.910212 | -1.761360 | 0.557853  |
| C  | -0.218841 | -1.997573 | -0.669146 |
| C  | 1.166787  | -2.001277 | -0.324244 |
| N  | 1.223050  | -1.779943 | 1.078128  |
| C  | -2.342984 | -1.469806 | 0.680527  |
| C  | -2.710047 | -0.069975 | 0.166602  |
| C  | -4.180409 | 0.272212  | 0.439698  |
| C  | -4.565393 | 1.656495  | -0.093513 |
| C  | 2.443947  | -1.458003 | 1.819492  |
| F  | 1.178324  | 1.956142  | -0.928552 |
| B  | 1.287224  | 2.056084  | 0.524851  |
| F  | 1.134368  | 3.363100  | 0.897471  |
| F  | 0.261357  | 1.239407  | 1.084209  |
| F  | 2.531770  | 1.522797  | 0.887166  |
| H  | -0.723069 | -2.596982 | -1.419185 |
| H  | 1.969748  | -2.572020 | -0.775809 |
| H  | 2.714308  | -0.416745 | 1.620296  |
| H  | 2.261626  | -1.607843 | 2.886059  |
| H  | 3.238633  | -2.134353 | 1.495907  |
| H  | -0.253314 | -1.255165 | 2.526874  |
| H  | -2.601046 | -1.574086 | 1.739982  |
| H  | -2.886389 | -2.249628 | 0.134867  |
| H  | -2.042282 | 0.662950  | 0.633551  |
| H  | -2.508702 | -0.024955 | -0.911532 |
| H  | -4.830182 | -0.490485 | -0.013901 |
| H  | -4.369360 | 0.232207  | 1.522188  |
| H  | -5.614668 | 1.885490  | 0.122852  |
| H  | -3.947805 | 2.439203  | 0.361370  |
| H  | -4.426579 | 1.714300  | -1.179611 |
| Pd | 0.694911  | -0.224263 | -1.338304 |

HF=-974.8452665

Zero-point correction= 0.240373

Cartesian coordinate:

|    |           |           |           |
|----|-----------|-----------|-----------|
| C  | 0.056628  | -0.759279 | -0.355790 |
| N  | 0.260097  | 0.551902  | -0.251529 |
| C  | 1.342905  | 0.778294  | 0.620376  |
| C  | 1.784427  | -0.506504 | 1.035270  |
| N  | 0.930882  | -1.426225 | 0.397354  |
| C  | -0.669787 | 1.568939  | -0.781268 |
| C  | -1.639168 | 2.064573  | 0.298942  |
| C  | -2.783265 | 2.881914  | -0.315395 |
| C  | -3.735087 | 3.444495  | 0.744892  |
| C  | 0.917213  | -2.879479 | 0.570355  |
| F  | -2.291783 | -1.117132 | 1.040479  |
| B  | -2.867266 | -1.622613 | -0.153233 |
| F  | -4.158537 | -2.037040 | 0.029570  |
| F  | -2.775152 | -0.595631 | -1.139154 |
| F  | -2.029940 | -2.695926 | -0.605075 |
| H  | 1.394649  | 1.715309  | 1.160043  |
| H  | 2.255875  | -0.790850 | 1.967930  |
| H  | -0.057034 | -3.240137 | 0.235126  |
| H  | 1.725324  | -3.340667 | -0.004591 |
| H  | 1.045892  | -3.108121 | 1.631255  |
| H  | -0.708433 | -1.228040 | -0.958327 |
| H  | -1.233964 | 1.079116  | -1.575077 |
| H  | -0.069947 | 2.377539  | -1.210875 |
| H  | -2.049498 | 1.186373  | 0.807028  |
| H  | -1.097570 | 2.667503  | 1.042588  |
| H  | -2.377596 | 3.705652  | -0.921458 |
| H  | -3.338237 | 2.224743  | -0.996409 |
| H  | -4.555882 | 4.002809  | 0.281238  |
| H  | -4.174681 | 2.637639  | 1.342217  |
| H  | -3.213711 | 4.124483  | 1.430467  |
| Pd | 3.306735  | 0.405953  | -0.202662 |

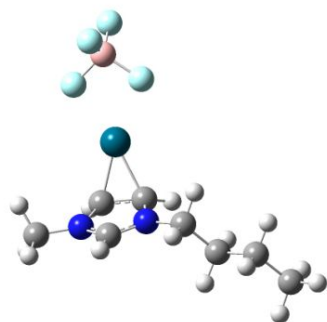

c3

HF=-974.8497923

Cartesian coordinate:

|    |           |           |           |
|----|-----------|-----------|-----------|
| C  | -0.960138 | 0.468092  | -0.843405 |
| C  | -0.210633 | 1.701200  | -0.935481 |
| N  | -0.677099 | 2.504936  | 0.158869  |
| C  | -1.576018 | 1.815109  | 0.855848  |
| N  | -1.812989 | 0.630404  | 0.302152  |
| H  | -1.374200 | -0.104632 | -1.667123 |
| H  | 0.050509  | 2.245410  | -1.838850 |
| C  | -0.107974 | 3.792483  | 0.529937  |
| H  | -0.689317 | 4.228908  | 1.344982  |
| H  | 0.930752  | 3.662354  | 0.847363  |
| H  | -0.139219 | 4.466379  | -0.331269 |
| H  | -2.004591 | 2.145942  | 1.792173  |
| C  | -2.716269 | -0.397137 | 0.829097  |
| H  | -3.050105 | -0.063929 | 1.817409  |
| C  | -3.920946 | -0.662702 | -0.081332 |
| H  | -2.125038 | -1.308010 | 0.971282  |
| C  | -4.846324 | -1.742841 | 0.496561  |
| H  | -4.477902 | 0.273048  | -0.224836 |
| H  | -3.569441 | -0.976441 | -1.072769 |
| C  | -6.053635 | -2.029252 | -0.402199 |
| H  | -4.273327 | -2.667656 | 0.648130  |
| H  | -5.194521 | -1.430290 | 1.491139  |
| H  | -6.694885 | -2.801635 | 0.035357  |
| H  | -6.664459 | -1.129941 | -0.546532 |
| H  | -5.736913 | -2.379851 | -1.391617 |
| Pd | 1.027578  | 0.136205  | -0.446203 |
| B  | 3.417720  | -1.257437 | 0.332979  |
| F  | 4.302863  | -1.858138 | -0.518686 |
| F  | 3.744438  | -1.356673 | 1.659852  |
| F  | 3.257246  | 0.148540  | -0.028414 |
| F  | 2.077420  | -1.795396 | 0.116616  |

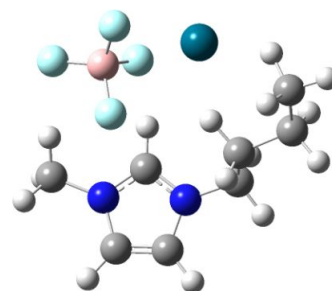

c4

HF=-974.8229145

Cartesian coordinate:

|    |           |           |           |
|----|-----------|-----------|-----------|
| C  | -2.245667 | 0.365612  | 0.551148  |
| N  | -2.145962 | 1.675519  | 0.294425  |
| C  | -3.204553 | 2.049866  | -0.516233 |
| C  | -3.953770 | 0.932808  | -0.734010 |
| N  | -3.336789 | -0.107007 | -0.059601 |
| C  | -0.989241 | 2.511143  | 0.684864  |
| C  | 0.271071  | 2.126227  | -0.095537 |
| C  | 1.511220  | 2.922935  | 0.333478  |
| C  | 2.806301  | 2.260139  | -0.157478 |
| C  | -3.743190 | -1.519172 | -0.068539 |
| F  | -0.565482 | -1.185745 | -0.845858 |
| B  | -0.111662 | -2.088477 | 0.144981  |
| F  | 1.236027  | -2.416758 | -0.098580 |
| F  | -0.208104 | -1.430935 | 1.409547  |
| F  | -0.929575 | -3.214787 | 0.151529  |
| H  | -3.327392 | 3.063689  | -0.862840 |
| H  | -4.857266 | 0.786528  | -1.304376 |
| H  | -2.858177 | -2.148610 | 0.049385  |
| H  | -4.461143 | -1.706312 | 0.734497  |
| H  | -4.206769 | -1.734861 | -1.032712 |
| H  | -1.526307 | -0.230918 | 1.108282  |
| H  | -0.837192 | 2.378392  | 1.760440  |
| H  | -1.285811 | 3.551329  | 0.517548  |
| H  | 0.476205  | 1.051905  | 0.050903  |
| H  | 0.089113  | 2.258528  | -1.169774 |
| H  | 1.450053  | 3.950738  | -0.050863 |
| H  | 1.543196  | 3.001466  | 1.429254  |
| H  | 3.679671  | 2.900548  | 0.008412  |
| H  | 3.018467  | 1.329243  | 0.447773  |
| H  | 2.761981  | 2.028581  | -1.228188 |
| Pd | 2.408046  | -0.362625 | -0.181790 |

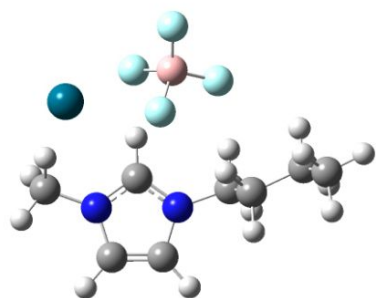

c5

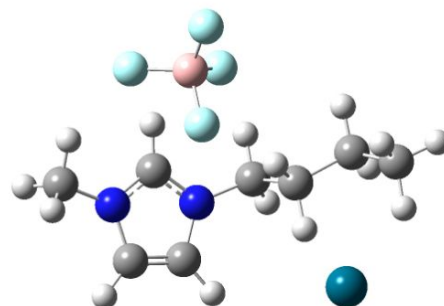

c6

HF=-974.8198901

Cartesian coordinate:

|    |           |           |           |
|----|-----------|-----------|-----------|
| C  | 0.000000  | 0.000000  | 0.000000  |
| N  | 0.000000  | 0.000000  | 1.334582  |
| C  | 1.313468  | 0.000000  | 1.773832  |
| C  | 2.106731  | 0.012098  | 0.665659  |
| N  | 1.263474  | 0.010451  | -0.433271 |
| C  | -1.215151 | -0.212246 | 2.149537  |
| C  | -1.369630 | -1.682036 | 2.554948  |
| C  | -2.762051 | -1.953176 | 3.138691  |
| C  | -2.924840 | -3.401124 | 3.610724  |
| C  | 1.637481  | -0.072828 | -1.849339 |
| F  | -0.868829 | -2.619678 | -0.599696 |
| B  | -1.926365 | -2.003102 | -1.309531 |
| F  | -2.751958 | -2.913786 | -1.910455 |
| F  | -2.638076 | -1.177751 | -0.385084 |
| F  | -1.336932 | -1.116750 | -2.270956 |
| H  | 1.565287  | -0.013074 | 2.822444  |
| H  | 3.180388  | 0.019397  | 0.562803  |
| H  | 0.768368  | -0.447478 | -2.393326 |
| H  | 1.937326  | 0.910805  | -2.220805 |
| H  | 2.465851  | -0.776245 | -1.953129 |
| H  | -0.873988 | -0.045452 | -0.632910 |
| H  | -2.054973 | 0.084276  | 1.520904  |
| H  | -1.156589 | 0.458563  | 3.012717  |
| H  | -1.222652 | -2.293523 | 1.659266  |
| H  | -0.590179 | -1.951354 | 3.282383  |
| H  | -2.963266 | -1.267465 | 3.975288  |
| H  | -3.503505 | -1.735181 | 2.359857  |
| H  | -3.933190 | -3.577230 | 4.001139  |
| H  | -2.758491 | -4.101757 | 2.784625  |
| H  | -2.210645 | -3.645028 | 4.407216  |
| Pd | 0.691022  | -2.552495 | -2.420256 |

HF=-974.8205848

Cartesian coordinate:

|    |           |           |           |
|----|-----------|-----------|-----------|
| C  | 2.076675  | -1.028332 | 0.741988  |
| N  | 0.833592  | -1.170333 | 1.207589  |
| C  | 0.335680  | -2.387385 | 0.770588  |
| C  | 1.320773  | -2.982824 | 0.040278  |
| N  | 2.400388  | -2.114209 | 0.034869  |
| C  | 0.071744  | -0.080366 | 1.849796  |
| C  | -0.839825 | 0.617921  | 0.837757  |
| C  | -1.515212 | 1.864021  | 1.413756  |
| C  | -2.530232 | 2.462166  | 0.436752  |
| C  | 3.662645  | -2.259278 | -0.698437 |
| F  | 1.680621  | 0.919622  | -1.246833 |
| B  | 2.635531  | 1.695165  | -0.544050 |
| F  | 2.888929  | 2.890865  | -1.158996 |
| F  | 2.138848  | 1.880466  | 0.783291  |
| F  | 3.824858  | 0.903331  | -0.424370 |
| H  | -0.666621 | -2.710596 | 1.003467  |
| H  | 1.347711  | -3.932048 | -0.471014 |
| H  | 4.082969  | -1.259437 | -0.822418 |
| H  | 4.349790  | -2.907533 | -0.147815 |
| H  | 3.451413  | -2.691403 | -1.678520 |
| H  | 2.705248  | -0.159784 | 0.869745  |
| H  | 0.809862  | 0.628097  | 2.227193  |
| H  | -0.485714 | -0.509104 | 2.688488  |
| H  | -0.238619 | 0.877680  | -0.037849 |
| H  | -1.629513 | -0.113379 | 0.510087  |
| H  | -2.014651 | 1.620027  | 2.362347  |
| H  | -0.736883 | 2.604702  | 1.638273  |
| H  | -3.061019 | 3.315186  | 0.873563  |
| H  | -2.042326 | 2.798477  | -0.484345 |
| H  | -3.291003 | 1.701880  | 0.157311  |
| Pd | -3.232369 | -0.463715 | -0.621699 |

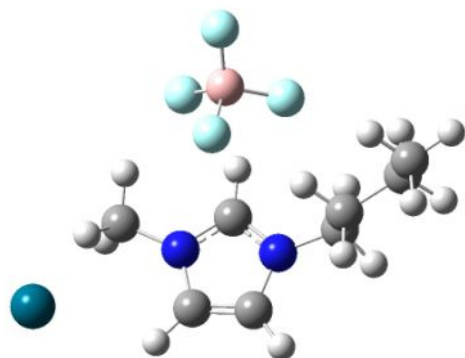

c7

HF=-974.816674

Cartesian coordinate:

|    |           |           |           |
|----|-----------|-----------|-----------|
| C  | 0.404428  | -0.279902 | -0.986815 |
| N  | 1.046347  | -1.440498 | -0.838398 |
| C  | 0.168979  | -2.361642 | -0.288012 |
| C  | -1.025274 | -1.726195 | -0.118080 |
| N  | -0.853533 | -0.425087 | -0.560532 |
| C  | 2.508165  | -1.584108 | -1.004504 |
| C  | 3.238497  | -1.455489 | 0.337380  |
| C  | 4.751461  | -1.301891 | 0.134768  |
| C  | 5.513636  | -1.234226 | 1.461987  |
| C  | -1.813247 | 0.675792  | -0.470622 |
| F  | 1.498982  | 1.315712  | 1.031620  |
| B  | 1.871716  | 2.212448  | 0.001050  |
| F  | 2.504923  | 3.325734  | 0.481519  |
| F  | 2.695555  | 1.490430  | -0.916328 |
| F  | 0.676316  | 2.557490  | -0.715818 |
| H  | 0.468379  | -3.373526 | -0.065789 |
| H  | -1.974116 | -2.063714 | 0.273677  |
| H  | -1.262576 | 1.613021  | -0.582825 |
| H  | -2.576385 | 0.586558  | -1.258471 |
| H  | -2.252318 | 0.678912  | 0.551889  |
| H  | 0.838175  | 0.639125  | -1.350630 |
| H  | 2.817101  | -0.776073 | -1.668325 |
| H  | 2.695370  | -2.544420 | -1.495510 |
| H  | 2.845463  | -0.571253 | 0.848795  |
| H  | 3.023110  | -2.333420 | 0.963370  |
| H  | 5.139679  | -2.133648 | -0.471818 |
| H  | 4.925025  | -0.380617 | -0.435466 |
| H  | 6.587840  | -1.100789 | 1.292971  |
| H  | 5.163199  | -0.393003 | 2.070636  |
| H  | 5.378793  | -2.152155 | 2.047879  |
| Pd | -4.160584 | -0.136880 | 0.342203  |

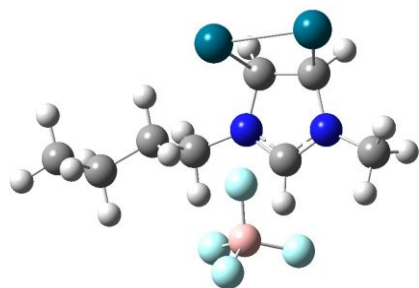

d1

$HF=-1101.603601$

Zero-point correction= 0.240084

Cartesian coordinate:

|    |           |           |           |
|----|-----------|-----------|-----------|
| C  | -0.426160 | 1.247115  | 1.357743  |
| N  | -0.462350 | -0.058071 | 1.606754  |
| C  | 0.854211  | -0.603259 | 1.439757  |
| C  | 1.725052  | 0.560143  | 1.199079  |
| N  | 0.813180  | 1.672264  | 1.158864  |
| C  | -1.702453 | -0.838790 | 1.730502  |
| C  | -2.050279 | -1.593595 | 0.441718  |
| C  | -3.450107 | -2.217791 | 0.493579  |
| C  | -3.773868 | -3.037291 | -0.759382 |
| C  | 1.146114  | 3.058076  | 0.827789  |
| F  | -1.396529 | 1.206284  | -1.174034 |
| B  | -2.469497 | 2.044535  | -0.753156 |
| F  | -3.285649 | 2.387540  | -1.796650 |
| F  | -3.177161 | 1.340511  | 0.264296  |
| F  | -1.892064 | 3.195305  | -0.132396 |
| H  | 1.143060  | -1.365668 | 2.167508  |
| H  | 2.605406  | 0.718436  | 1.834934  |
| H  | 0.226281  | 3.559772  | 0.522530  |
| H  | 1.599011  | 3.559058  | 1.690155  |
| H  | 1.847046  | 3.062122  | -0.009259 |
| H  | -1.296918 | 1.885013  | 1.293771  |
| H  | -2.496642 | -0.124690 | 1.949912  |
| H  | -1.584629 | -1.519852 | 2.581477  |
| H  | -1.992418 | -0.882478 | -0.387012 |
| H  | -1.295613 | -2.392787 | 0.274429  |
| H  | -3.549930 | -2.851272 | 1.387052  |
| H  | -4.174448 | -1.399788 | 0.594889  |
| H  | -4.788030 | -3.448490 | -0.710585 |
| H  | -3.707297 | -2.416557 | -1.660217 |
| H  | -3.078702 | -3.878720 | -0.876751 |
| Pd | 2.699337  | 0.211143  | -0.571368 |
| Pd | 0.871599  | -1.659850 | -0.321720 |

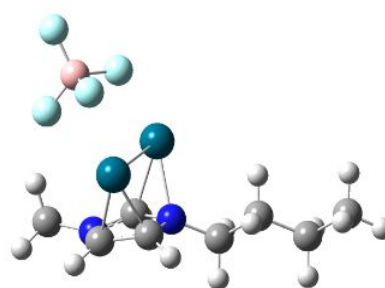

d2

$HF=-1101.5972545$

Zero-point correction= 0.239555

Cartesian coordinate:

|    |           |           |           |
|----|-----------|-----------|-----------|
| C  | -0.529860 | 1.244513  | -1.465908 |
| N  | -1.417851 | 0.856734  | -0.454966 |
| C  | -0.951516 | 1.491958  | 0.785068  |
| C  | 0.155249  | 2.304220  | 0.414391  |
| N  | 0.314471  | 2.212785  | -0.980013 |
| C  | -2.870744 | 0.680676  | -0.698110 |
| C  | -3.488552 | -0.400628 | 0.186987  |
| C  | -4.991273 | -0.571430 | -0.076741 |
| C  | -5.621207 | -1.661881 | 0.796158  |
| C  | 1.535851  | 2.609247  | -1.676562 |
| F  | 2.397420  | -1.094082 | 1.274935  |
| B  | 2.858375  | -1.275759 | -0.079749 |
| F  | 3.967273  | -2.062643 | -0.102645 |
| F  | 1.781675  | -1.943482 | -0.816018 |
| F  | 3.045251  | -0.020588 | -0.655906 |
| H  | -1.714645 | 1.715739  | 1.521489  |
| H  | 0.524586  | 3.193292  | 0.910862  |
| H  | 2.319113  | 1.863846  | -1.512316 |
| H  | 1.322777  | 2.702010  | -2.745128 |
| H  | 1.854751  | 3.582614  | -1.295120 |
| H  | -0.819308 | 1.243819  | -2.511403 |
| H  | -2.984301 | 0.418091  | -1.754186 |
| H  | -3.360543 | 1.650623  | -0.534583 |
| H  | -2.961108 | -1.345552 | 0.000864  |
| H  | -3.324941 | -0.154693 | 1.244449  |
| H  | -5.506171 | 0.383454  | 0.100159  |
| H  | -5.149105 | -0.814334 | -1.136995 |
| H  | -6.691292 | -1.765358 | 0.586847  |
| H  | -5.149029 | -2.634772 | 0.615899  |
| H  | -5.509589 | -1.430361 | 1.862134  |
| Pd | 0.760502  | 0.526974  | 1.489632  |
| Pd | -0.099017 | -0.783695 | -0.876684 |

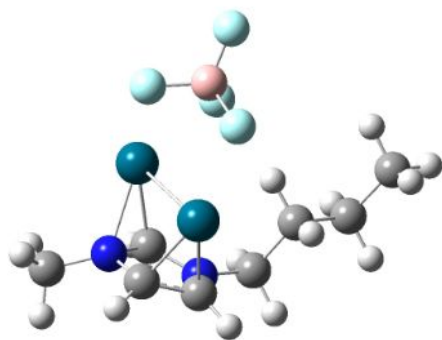

d3

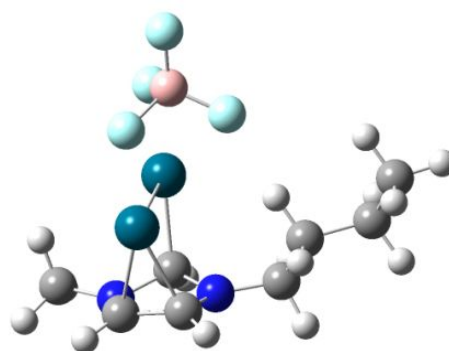

d4

*HF* = -1101.5933729

*Cartesian coordinate:*

|    |           |           |           |
|----|-----------|-----------|-----------|
| C  | -0.333904 | -1.731358 | -1.152385 |
| N  | 0.662749  | -2.058878 | -0.246818 |
| C  | 0.130108  | -2.051705 | 1.060405  |
| C  | -1.280806 | -1.914443 | 0.935114  |
| N  | -1.560506 | -1.766442 | -0.470120 |
| C  | 2.088039  | -2.043228 | -0.559542 |
| C  | 2.815789  | -0.759595 | -0.131137 |
| C  | 4.281484  | -0.765851 | -0.586677 |
| C  | 5.049557  | 0.478572  | -0.128798 |
| C  | -2.853059 | -2.176260 | -1.053357 |
| F  | -0.290208 | 2.158073  | 1.221061  |
| B  | -0.241760 | 2.733262  | -0.104954 |
| F  | 0.176487  | 4.014007  | -0.038745 |
| F  | 0.629518  | 1.921769  | -0.910596 |
| F  | -1.522164 | 2.548652  | -0.690846 |
| H  | 0.667931  | -2.610414 | 1.818073  |
| H  | -2.047077 | -2.375695 | 1.546767  |
| H  | -3.441437 | -1.294445 | -1.292763 |
| H  | -2.683962 | -2.767407 | -1.957406 |
| H  | -3.390041 | -2.789723 | -0.323916 |
| H  | -0.257475 | -2.135969 | -2.161824 |
| H  | 2.183045  | -2.196058 | -1.640899 |
| H  | 2.544405  | -2.915565 | -0.072191 |
| H  | 2.289207  | 0.117062  | -0.527627 |
| H  | 2.768568  | -0.676810 | 0.962597  |
| H  | 4.782825  | -1.665964 | -0.200953 |
| H  | 4.322146  | -0.839179 | -1.682981 |
| H  | 6.086568  | 0.455183  | -0.482053 |
| H  | 4.584621  | 1.394423  | -0.510925 |
| H  | 5.069949  | 0.549675  | 0.965201  |
| Pd | -0.509821 | -0.116381 | 1.724199  |
| Pd | -0.931747 | 0.178610  | -1.189968 |

*HF* = -1101.5765968

*S* = 3

*Cartesian coordinate:*

|    |           |           |           |
|----|-----------|-----------|-----------|
| C  | 0.778190  | -1.805699 | -1.387139 |
| N  | 1.756897  | -1.665206 | -0.434651 |
| C  | 1.227400  | -2.024564 | 0.777471  |
| C  | -0.051062 | -2.557455 | 0.549022  |
| N  | -0.245272 | -2.551726 | -0.824853 |
| C  | 2.962182  | -0.871158 | -0.617875 |
| C  | 2.786935  | 0.582959  | -0.143714 |
| C  | 4.006836  | 1.444654  | -0.485724 |
| C  | 3.862087  | 2.883801  | 0.018049  |
| C  | -1.512911 | -2.683341 | -1.485233 |
| F  | -1.490257 | 1.464112  | 1.367169  |
| B  | -1.810264 | 1.871597  | 0.029670  |
| F  | -2.350385 | 3.088856  | 0.017440  |
| F  | -0.277472 | 2.339346  | -0.774117 |
| F  | -2.900332 | 0.946564  | -0.428755 |
| H  | 1.906618  | -2.335568 | 1.566099  |
| H  | -0.564633 | -3.305588 | 1.143256  |
| H  | -2.116366 | -1.761142 | -1.326454 |
| H  | -1.348143 | -2.804563 | -2.554123 |
| H  | -2.030129 | -3.558748 | -1.088611 |
| H  | 0.829247  | -1.468421 | -2.408936 |
| H  | 3.210760  | -0.905923 | -1.683825 |
| H  | 3.787789  | -1.360692 | -0.083700 |
| H  | 1.879543  | 1.022643  | -0.580928 |
| H  | 2.625806  | 0.584741  | 0.943387  |
| H  | 4.914508  | 0.992092  | -0.057172 |
| H  | 4.152557  | 1.449555  | -1.575275 |
| H  | 4.738929  | 3.484355  | -0.249317 |
| H  | 2.976556  | 3.363144  | -0.412196 |
| H  | 3.755255  | 2.912479  | 1.109111  |
| Pd | -0.196775 | -0.568450 | 1.529022  |
| Pd | -0.921492 | 0.209473  | -0.856368 |



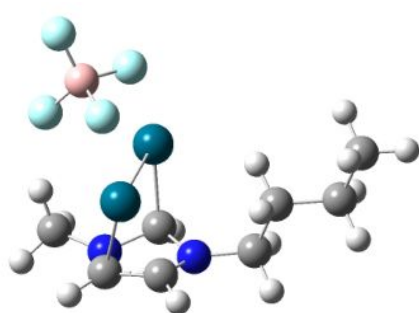

d5

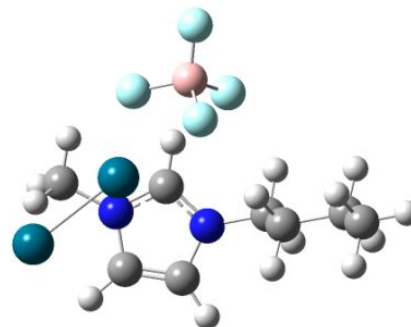

d6

HF=-1101.5758162

S=3

Cartesian coordinate:

|    |           |           |           |
|----|-----------|-----------|-----------|
| C  | -0.851498 | 1.537651  | -1.379316 |
| N  | -1.807955 | 1.483093  | -0.302556 |
| C  | -1.163819 | 1.872529  | 0.864325  |
| C  | 0.032222  | 2.521547  | 0.485011  |
| N  | 0.104704  | 2.511819  | -0.896393 |
| C  | -3.050272 | 0.721037  | -0.353743 |
| C  | -2.947948 | -0.734073 | 0.131116  |
| C  | -4.282033 | -1.480813 | 0.011988  |
| C  | -4.190911 | -2.931366 | 0.498358  |
| C  | 1.342234  | 2.798166  | -1.616058 |
| F  | 1.877410  | -1.304100 | 1.388523  |
| B  | 2.570121  | -1.488299 | 0.120739  |
| F  | 3.597483  | -2.362107 | 0.265735  |
| F  | 1.581535  | -2.003933 | -0.802441 |
| F  | 2.957732  | -0.220518 | -0.327776 |
| H  | -1.728079 | 2.009727  | 1.778387  |
| H  | 0.611232  | 3.234818  | 1.058391  |
| H  | 2.080712  | 2.000910  | -1.472852 |
| H  | 1.117105  | 2.900696  | -2.680292 |
| H  | 1.747917  | 3.746708  | -1.251699 |
| H  | -1.293034 | 1.796191  | -2.345842 |
| H  | -3.396684 | 0.749960  | -1.392568 |
| H  | -3.790971 | 1.264955  | 0.246836  |
| H  | -2.169792 | -1.242990 | -0.456644 |
| H  | -2.603779 | -0.744178 | 1.174016  |
| H  | -5.054305 | -0.948771 | 0.586514  |
| H  | -4.614977 | -1.466116 | -1.035645 |
| H  | -5.154265 | -3.443387 | 0.398437  |
| H  | -3.449106 | -3.495603 | -0.078926 |
| H  | -3.894636 | -2.977675 | 1.553087  |
| Pd | 0.546657  | 0.498692  | 1.240466  |
| Pd | 0.181801  | -0.310685 | -1.332317 |

HF=-1101.5671191

S=3

Cartesian coordinate:

|    |           |           |           |
|----|-----------|-----------|-----------|
| C  | 0.894920  | 1.426224  | 1.442276  |
| N  | 1.634100  | 2.128180  | 0.576084  |
| C  | 0.875770  | 3.187935  | 0.110807  |
| C  | -0.338967 | 3.113103  | 0.726464  |
| N  | -0.302333 | 2.009676  | 1.559713  |
| C  | 2.980571  | 1.727981  | 0.114403  |
| C  | 2.931030  | 0.902641  | -1.175060 |
| C  | 4.338707  | 0.501526  | -1.637415 |
| C  | 4.311840  | -0.338690 | -2.918517 |
| C  | -1.412347 | 1.475619  | 2.354930  |
| F  | 1.233290  | -1.955105 | -0.053862 |
| B  | 1.436477  | -1.915935 | 1.371968  |
| F  | 1.718375  | -3.152716 | 1.865725  |
| F  | 2.467878  | -0.980422 | 1.632065  |
| F  | 0.226376  | -1.384633 | 1.930619  |
| H  | 1.259547  | 3.892075  | -0.610346 |
| H  | -1.214956 | 3.736314  | 0.642160  |
| H  | -1.085861 | 0.536342  | 2.800905  |
| H  | -1.695579 | 2.195305  | 3.127077  |
| H  | -2.252703 | 1.266798  | 1.683357  |
| H  | 1.216205  | 0.516984  | 1.929226  |
| H  | 3.422231  | 1.137899  | 0.918654  |
| H  | 3.562154  | 2.646972  | -0.010186 |
| H  | 2.336862  | 0.001966  | -0.987000 |
| H  | 2.425835  | 1.477312  | -1.963762 |
| H  | 4.949476  | 1.402053  | -1.798086 |
| H  | 4.827080  | -0.069888 | -0.836887 |
| H  | 5.324976  | -0.620065 | -3.225708 |
| H  | 3.737327  | -1.259982 | -2.770078 |
| H  | 3.851963  | 0.213664  | -3.747130 |
| Pd | -3.122863 | 0.152358  | -0.829195 |
| Pd | -0.909131 | -1.047601 | -0.462999 |

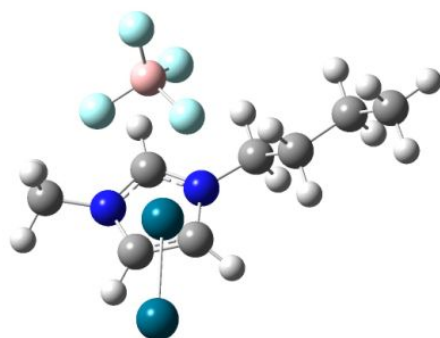

d7

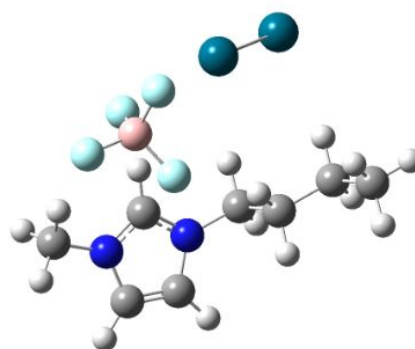

d8

HF=-1101.5686789

S=3

Cartesian coordinate:

|    |           |           |           |
|----|-----------|-----------|-----------|
| C  | 1.462520  | -1.414202 | 1.579672  |
| N  | 1.281691  | -0.095682 | 1.703683  |
| C  | -0.087548 | 0.169424  | 1.687297  |
| C  | -0.730127 | -1.068844 | 1.582588  |
| N  | 0.279004  | -2.034949 | 1.565379  |
| C  | 2.373906  | 0.901529  | 1.710886  |
| C  | 2.185089  | 1.990499  | 0.651837  |
| C  | 3.395519  | 2.932653  | 0.597880  |
| C  | 3.217427  | 4.046713  | -0.438181 |
| C  | 0.077595  | -3.456597 | 1.274686  |
| F  | 1.174617  | -0.339727 | -1.413884 |
| B  | 2.242038  | -1.327611 | -1.431334 |
| F  | 2.758067  | -1.427540 | -2.690376 |
| F  | 3.210795  | -0.897844 | -0.490246 |
| F  | 1.687720  | -2.539895 | -0.976995 |
| H  | -0.473421 | 1.126013  | 1.998287  |
| H  | -1.750710 | -1.338967 | 1.805322  |
| H  | 0.250158  | -3.620783 | 0.210469  |
| H  | 0.790350  | -4.045778 | 1.856291  |
| H  | -0.936680 | -3.727095 | 1.568414  |
| H  | 2.414368  | -1.884562 | 1.397628  |
| H  | 3.286521  | 0.342617  | 1.503287  |
| H  | 2.431353  | 1.326939  | 2.719279  |
| H  | 2.038154  | 1.502689  | -0.314953 |
| H  | 1.277975  | 2.572435  | 0.868894  |
| H  | 3.569393  | 3.375300  | 1.589454  |
| H  | 4.291963  | 2.347468  | 0.353232  |
| H  | 4.095532  | 4.700948  | -0.468846 |
| H  | 3.073203  | 3.629746  | -1.441281 |
| H  | 2.345025  | 4.670162  | -0.205783 |
| Pd | -3.387314 | 0.747248  | -0.214375 |
| Pd | -0.953672 | -0.033914 | -0.457429 |

HF=-1101.5635594

S=3

Cartesian coordinate:

|    |           |           |           |
|----|-----------|-----------|-----------|
| C  | 2.564591  | 0.514561  | -0.834990 |
| N  | 2.312338  | 1.812555  | -0.641663 |
| C  | 3.512353  | 2.468667  | -0.424152 |
| C  | 4.499128  | 1.531867  | -0.500317 |
| N  | 3.885522  | 0.316980  | -0.754180 |
| C  | 0.958925  | 2.387912  | -0.493564 |
| C  | 0.505594  | 2.406168  | 0.970209  |
| C  | -0.904516 | 2.992732  | 1.115234  |
| C  | -1.393198 | 2.983484  | 2.566643  |
| C  | 4.542261  | -0.993297 | -0.869409 |
| F  | 1.525317  | -0.883487 | 1.308736  |
| B  | 1.315285  | -2.133279 | 0.693809  |
| F  | 0.178985  | -2.751254 | 1.252436  |
| F  | 1.022344  | -1.886160 | -0.697700 |
| F  | 2.451131  | -2.921203 | 0.776845  |
| H  | 3.556815  | 3.529384  | -0.234395 |
| H  | 5.569097  | 1.620251  | -0.397937 |
| H  | 3.899083  | -1.755329 | -0.423089 |
| H  | 4.737984  | -1.222973 | -1.920050 |
| H  | 5.485255  | -0.951459 | -0.322142 |
| H  | 1.828113  | -0.268779 | -0.981365 |
| H  | 0.280219  | 1.775575  | -1.094772 |
| H  | 0.986792  | 3.392267  | -0.927916 |
| H  | 0.532015  | 1.377880  | 1.349311  |
| H  | 1.220250  | 2.991072  | 1.566722  |
| H  | -0.921826 | 4.019783  | 0.721874  |
| H  | -1.599700 | 2.403328  | 0.495885  |
| H  | -2.399008 | 3.410409  | 2.643413  |
| H  | -1.433885 | 1.960154  | 2.956716  |
| H  | -0.729929 | 3.566851  | 3.217575  |
| Pd | -1.478917 | -1.296747 | 0.215501  |
| Pd | -2.940291 | 0.430173  | -0.939170 |

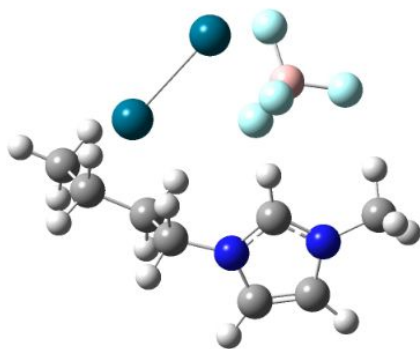

d9

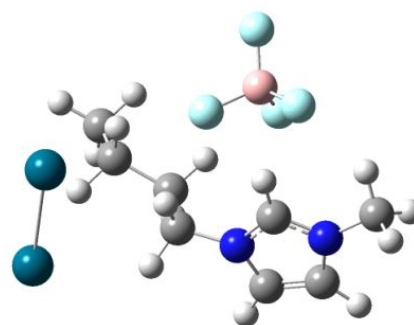

d10

*HF* = -1101.5581654

*Cartesian coordinate:*

|    |           |           |           |
|----|-----------|-----------|-----------|
| C  | 2.286811  | -0.480606 | -0.710969 |
| N  | 2.650053  | 0.805956  | -0.732386 |
| C  | 4.031628  | 0.877365  | -0.679356 |
| C  | 4.495943  | -0.403157 | -0.632481 |
| N  | 3.390223  | -1.235898 | -0.649698 |
| C  | 1.701734  | 1.933580  | -0.664369 |
| C  | 1.483252  | 2.425217  | 0.769983  |
| C  | 0.310345  | 3.411052  | 0.843711  |
| C  | 0.045339  | 3.914474  | 2.264706  |
| C  | 3.394046  | -2.703814 | -0.576559 |
| F  | 0.799336  | -0.778417 | 1.649136  |
| B  | 0.102675  | -1.940509 | 1.285569  |
| F  | -1.081300 | -2.082057 | 1.974781  |
| F  | -0.228275 | -1.799104 | -0.146036 |
| F  | 0.934679  | -3.057039 | 1.382464  |
| H  | 4.554590  | 1.820475  | -0.675615 |
| H  | 5.501162  | -0.791334 | -0.587481 |
| H  | 2.526513  | -3.025591 | 0.004560  |
| H  | 3.368489  | -3.128829 | -1.583484 |
| H  | 4.307753  | -3.018305 | -0.069518 |
| H  | 1.267746  | -0.853291 | -0.705912 |
| H  | 0.737726  | 1.564532  | -1.073193 |
| H  | 2.079803  | 2.721278  | -1.323701 |
| H  | 1.269074  | 1.554810  | 1.399276  |
| H  | 2.400192  | 2.899150  | 1.148808  |
| H  | 0.484910  | 4.262064  | 0.170508  |
| H  | -0.605938 | 2.890404  | 0.471251  |
| H  | -0.810079 | 4.598089  | 2.285043  |
| H  | -0.174777 | 3.079663  | 2.939357  |
| H  | 0.914093  | 4.452413  | 2.664918  |
| Pd | -2.450009 | -1.159032 | -0.346826 |
| Pd | -1.483276 | 1.361022  | -0.723809 |

*HF* = -1101.555155

*Cartesian coordinate:*

|    |           |           |           |
|----|-----------|-----------|-----------|
| C  | 2.776916  | 1.022740  | -0.647672 |
| N  | 1.686611  | 1.630524  | -0.174609 |
| C  | 2.061841  | 2.849914  | 0.364446  |
| C  | 3.409604  | 2.965948  | 0.193333  |
| N  | 3.835942  | 1.810224  | -0.440849 |
| C  | 0.375165  | 0.962256  | -0.057079 |
| C  | 0.181502  | 0.336741  | 1.329237  |
| C  | -0.955708 | -0.690026 | 1.310470  |
| C  | -1.336558 | -1.223056 | 2.693618  |
| C  | 5.212841  | 1.416413  | -0.758422 |
| F  | 3.153463  | -1.054695 | 1.212802  |
| B  | 3.033750  | -1.949669 | 0.121784  |
| F  | 3.210631  | -3.253489 | 0.496088  |
| F  | 1.743151  | -1.740902 | -0.460815 |
| F  | 3.992557  | -1.549280 | -0.865591 |
| H  | 1.346791  | 3.517497  | 0.818598  |
| H  | 4.092503  | 3.755836  | 0.463434  |
| H  | 5.220045  | 0.332114  | -0.884732 |
| H  | 5.550759  | 1.917718  | -1.669453 |
| H  | 5.859521  | 1.691150  | 0.077266  |
| H  | 2.816795  | 0.036745  | -1.086724 |
| H  | 0.361144  | 0.177313  | -0.815025 |
| H  | -0.411393 | 1.690110  | -0.290061 |
| H  | 1.109845  | -0.168764 | 1.612484  |
| H  | -0.031486 | 1.121018  | 2.068529  |
| H  | -1.889881 | -0.162475 | 0.885244  |
| H  | -0.621012 | -1.529515 | 0.674389  |
| H  | -2.135396 | -1.967141 | 2.620414  |
| H  | -0.471082 | -1.699458 | 3.169079  |
| H  | -1.684831 | -0.413723 | 3.346385  |
| Pd | -3.227215 | 1.201988  | 0.042099  |
| Pd | -2.255193 | -1.204066 | -0.852979 |

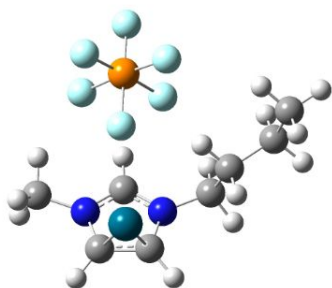

e1

HF=-1491.0546162

Zero-point correction= 0.244218

Cartesian coordinate:

|    |           |           |           |
|----|-----------|-----------|-----------|
| N  | 0.000000  | 0.000000  | 0.000000  |
| C  | 0.000000  | 0.000000  | 1.384600  |
| C  | 1.302300  | 0.000000  | 1.786300  |
| N  | 2.077500  | -0.008500 | 0.638300  |
| C  | 1.266800  | -0.010400 | -0.423200 |
| C  | 3.539100  | -0.098100 | 0.552900  |
| C  | -1.166300 | -0.185800 | -0.892400 |
| C  | -1.523600 | -1.667600 | -1.056600 |
| C  | -2.510100 | -1.893700 | -2.210100 |
| C  | -2.715500 | -3.385000 | -2.495200 |
| H  | -0.915400 | -0.001900 | 1.955000  |
| H  | 1.739900  | 0.004700  | 2.772100  |
| H  | 3.794700  | -0.430300 | -0.454200 |
| H  | 3.990600  | 0.874500  | 0.765500  |
| H  | 3.889700  | -0.836500 | 1.276500  |
| H  | 1.582700  | -0.072100 | -1.452800 |
| H  | -0.883500 | 0.239000  | -1.856600 |
| H  | -1.989100 | 0.405600  | -0.478800 |
| H  | -0.602200 | -2.215700 | -1.266000 |
| H  | -1.937500 | -2.057000 | -0.115800 |
| H  | -3.472600 | -1.408700 | -1.991600 |
| H  | -2.106100 | -1.414300 | -3.110800 |
| H  | -3.429700 | -3.534700 | -3.312300 |
| H  | -1.765000 | -3.845200 | -2.785700 |
| H  | -3.099200 | -3.914400 | -1.614100 |
| P  | 2.028000  | -2.268700 | -3.033400 |
| F  | 0.830200  | -1.102300 | -3.058800 |
| F  | 1.669000  | -2.513400 | -1.430100 |
| F  | 3.208700  | -3.360400 | -2.936800 |
| F  | 2.366000  | -1.943600 | -4.573600 |
| F  | 3.078200  | -1.067700 | -2.540400 |
| F  | 0.928600  | -3.386600 | -3.438700 |
| Pd | 0.939100  | -2.300100 | 0.940100  |

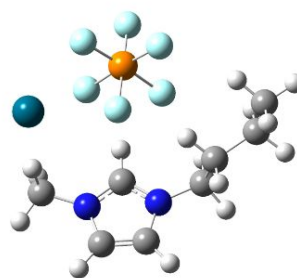

e2

HF=-1491.0292233

Zero-point correction= 0.243750

Cartesian coordinate:

|    |           |           |           |
|----|-----------|-----------|-----------|
| N  | 1.652290  | 2.221160  | 0.467554  |
| C  | 1.445716  | 3.384968  | -0.250643 |
| C  | 0.115669  | 3.674946  | -0.171290 |
| N  | -0.470765 | 2.682674  | 0.595896  |
| C  | 0.477672  | 1.811755  | 0.960307  |
| C  | -1.902714 | 2.494406  | 0.832217  |
| C  | 2.909080  | 1.445121  | 0.548623  |
| C  | 3.124052  | 0.573748  | -0.694360 |
| C  | 4.253166  | -0.445137 | -0.487301 |
| C  | 4.341660  | -1.439330 | -1.650032 |
| H  | 2.253884  | 3.903419  | -0.741653 |
| H  | -0.457085 | 4.492274  | -0.579853 |
| H  | -2.303652 | 1.740039  | 0.100602  |
| H  | -2.056432 | 2.117808  | 1.843342  |
| H  | -2.407449 | 3.453492  | 0.709949  |
| H  | 0.308273  | 0.896435  | 1.505433  |
| H  | 2.824156  | 0.815842  | 1.435035  |
| H  | 3.722450  | 2.160636  | 0.705562  |
| H  | 2.193820  | 0.038255  | -0.897024 |
| H  | 3.337737  | 1.210805  | -1.564114 |
| H  | 5.214056  | 0.072250  | -0.352113 |
| H  | 4.054464  | -1.000260 | 0.438238  |
| H  | 5.160743  | -2.150788 | -1.497959 |
| H  | 3.408729  | -2.007974 | -1.729594 |
| H  | 4.515229  | -0.927961 | -2.605178 |
| P  | -0.034485 | -1.729695 | 0.546673  |
| F  | 1.279166  | -1.022736 | 1.276618  |
| F  | -0.015987 | -0.484175 | -0.571136 |
| F  | -1.358044 | -2.334755 | -0.183871 |
| F  | -0.059087 | -2.882753 | 1.667195  |
| F  | -1.001562 | -0.761755 | 1.494917  |
| F  | 0.952063  | -2.578617 | -0.414016 |
| Pd | -2.701675 | -0.035118 | -0.790596 |

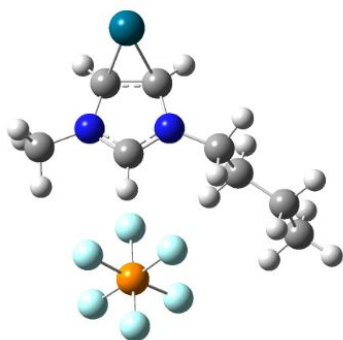

e3

HF=-1491.0508914

Cartesian coordinate:

|    |           |           |           |
|----|-----------|-----------|-----------|
| N  | 0.995419  | 0.715447  | -0.202123 |
| C  | 2.115472  | 0.714007  | 0.652313  |
| C  | 2.316525  | -0.640451 | 1.029552  |
| N  | 1.296135  | -1.369381 | 0.388381  |
| C  | 0.550423  | -0.532958 | -0.333077 |
| C  | 1.026574  | -2.801066 | 0.527828  |
| C  | 0.278682  | 1.905853  | -0.706509 |
| C  | -0.704496 | 2.461502  | 0.331821  |
| C  | -1.668721 | 3.484855  | -0.283415 |
| C  | -2.769399 | 3.891083  | 0.702398  |
| H  | 2.348985  | 1.612025  | 1.210438  |
| H  | 2.740098  | -1.031732 | 1.946352  |
| H  | 0.004246  | -2.984933 | 0.194437  |
| H  | 1.738056  | -3.382761 | -0.064958 |
| H  | 1.117308  | -3.074981 | 1.581791  |
| H  | -0.304504 | -0.825044 | -0.923950 |
| H  | -0.265581 | 1.584375  | -1.595621 |
| H  | 1.034855  | 2.637243  | -1.007831 |
| H  | -1.283526 | 1.625012  | 0.729653  |
| H  | -0.151457 | 2.913342  | 1.167789  |
| H  | -1.116947 | 4.371050  | -0.629201 |
| H  | -2.135854 | 3.031884  | -1.167145 |
| H  | -3.444695 | 4.629689  | 0.256521  |
| H  | -3.362412 | 3.013952  | 0.983326  |
| H  | -2.349729 | 4.330043  | 1.616385  |
| P  | -2.936033 | -0.948655 | -0.096379 |
| F  | -2.153434 | 0.100768  | -1.134386 |
| F  | -1.764779 | -0.611600 | 1.034781  |
| F  | -3.618435 | -1.993104 | 0.924803  |
| F  | -4.010555 | -1.277658 | -1.250633 |
| F  | -1.931449 | -2.149572 | -0.675454 |
| F  | -3.818673 | 0.288226  | 0.467193  |
| Pd | 3.961660  | 0.005385  | -0.216920 |

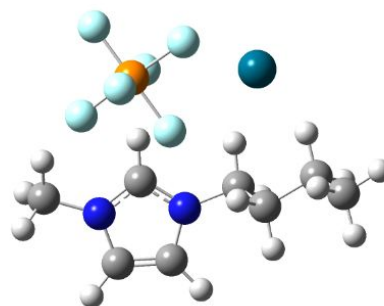

e4

HF=-1491.0291629

Cartesian coordinate:

|    |           |           |           |
|----|-----------|-----------|-----------|
| N  | 1.169955  | 2.265274  | -0.430816 |
| C  | 2.022914  | 3.293097  | -0.065400 |
| C  | 3.274067  | 2.761241  | 0.026958  |
| N  | 3.164087  | 1.414873  | -0.278045 |
| C  | 1.882544  | 1.139962  | -0.550139 |
| C  | 4.253096  | 0.431553  | -0.299236 |
| C  | -0.298610 | 2.342536  | -0.564757 |
| C  | -1.006767 | 2.492339  | 0.784342  |
| C  | -2.524707 | 2.329903  | 0.629800  |
| C  | -3.273157 | 2.434338  | 1.960448  |
| H  | 1.668640  | 4.298222  | 0.099214  |
| H  | 4.219502  | 3.213570  | 0.281829  |
| H  | 3.812565  | -0.563282 | -0.240664 |
| H  | 4.839752  | 0.543581  | -1.214863 |
| H  | 4.891441  | 0.595047  | 0.571396  |
| H  | 1.480090  | 0.168928  | -0.812021 |
| H  | -0.629241 | 1.400666  | -1.043048 |
| H  | -0.523786 | 3.172600  | -1.242247 |
| H  | -0.626949 | 1.718153  | 1.458983  |
| H  | -0.775442 | 3.471527  | 1.228120  |
| H  | -2.914647 | 3.072439  | -0.079998 |
| H  | -2.721966 | 1.323149  | 0.179238  |
| H  | -4.349799 | 2.296954  | 1.815115  |
| H  | -2.929391 | 1.667111  | 2.663265  |
| H  | -3.120581 | 3.415219  | 2.428722  |
| P  | 0.552257  | -2.107122 | 0.437916  |
| F  | 0.546193  | -1.441471 | -1.104465 |
| F  | 0.186026  | -0.592299 | 1.010833  |
| F  | 0.570480  | -2.679075 | 1.941524  |
| F  | 0.933023  | -3.539342 | -0.192162 |
| F  | 2.152937  | -1.702909 | 0.537173  |
| F  | -1.046124 | -2.416489 | 0.280425  |
| Pd | -2.108727 | -0.346818 | -0.901995 |

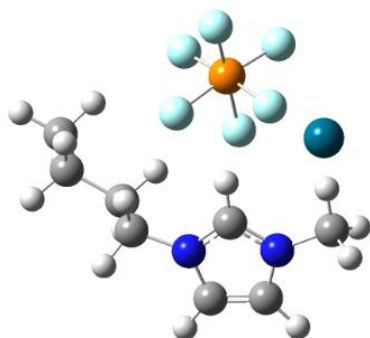

e5

HF= -1490.991762

Cartesian coordinate:

|    |           |           |           |
|----|-----------|-----------|-----------|
| N  | 0.000000  | 0.000000  | 0.000000  |
| C  | 0.000000  | 0.000000  | 1.384146  |
| C  | 1.302720  | 0.000000  | 1.786473  |
| N  | 2.078910  | -0.001479 | 0.640036  |
| C  | 1.268209  | -0.008954 | -0.422291 |
| C  | 3.541302  | -0.093029 | 0.570650  |
| C  | -1.172848 | -0.150861 | -0.889425 |
| C  | -1.603415 | -1.615462 | -1.028484 |
| C  | -2.632733 | -1.802377 | -2.151754 |
| C  | -2.927429 | -3.283365 | -2.412787 |
| H  | -0.915184 | -0.002029 | 1.954744  |
| H  | 1.739950  | -0.000782 | 2.772306  |
| H  | 3.823900  | -0.211493 | -0.475229 |
| H  | 3.991404  | 0.808807  | 0.993156  |
| H  | 3.865947  | -0.981724 | 1.119284  |
| H  | 1.585253  | -0.070827 | -1.450833 |
| H  | -0.873331 | 0.244973  | -1.861017 |
| H  | -1.968727 | 0.483768  | -0.487397 |
| H  | -0.715629 | -2.211195 | -1.253970 |
| H  | -2.009719 | -1.976805 | -0.073656 |
| H  | -3.561381 | -1.265571 | -1.910046 |
| H  | -2.233821 | -1.352403 | -3.070200 |
| H  | -3.673602 | -3.402160 | -3.205917 |
| H  | -2.014325 | -3.801320 | -2.726597 |
| H  | -3.311471 | -3.781550 | -1.514012 |
| P  | 1.942516  | -2.302335 | -3.139883 |
| F  | 0.791198  | -1.111141 | -3.118698 |
| F  | 1.532880  | -2.606739 | -1.506479 |
| F  | 3.074640  | -3.455667 | -3.023980 |
| F  | 2.331281  | -1.954082 | -4.654429 |
| F  | 3.021541  | -1.185913 | -2.564435 |
| F  | 0.818307  | -3.374382 | -3.575704 |
| Pd | 2.979891  | -3.869801 | -0.066657 |

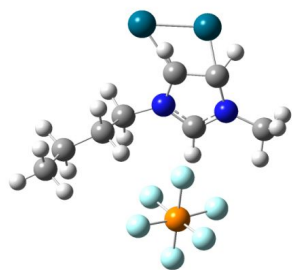

f1

*HF* = -1617.8118535

Zero-point correction = 0.244381

Cartesian coordinate:

|    |           |           |           |
|----|-----------|-----------|-----------|
| N  | -0.255351 | 0.549192  | 1.748194  |
| C  | -1.638326 | 0.635735  | 1.374665  |
| C  | -2.085055 | -0.760084 | 1.226663  |
| N  | -0.889307 | -1.531423 | 1.443690  |
| C  | 0.130115  | -0.722280 | 1.693680  |
| C  | -0.761003 | -2.980687 | 1.294482  |
| C  | 0.661865  | 1.692963  | 1.881202  |
| C  | 1.020162  | 2.322838  | 0.529611  |
| C  | 2.152307  | 3.352373  | 0.634134  |
| C  | 2.598635  | 3.848287  | -0.745111 |
| H  | -2.235629 | 1.346451  | 1.951361  |
| H  | -2.959241 | -1.111940 | 1.788945  |
| H  | 0.298050  | -3.224702 | 1.204048  |
| H  | -1.205281 | -3.492781 | 2.154594  |
| H  | -1.269653 | -3.289464 | 0.379183  |
| H  | 1.154905  | -1.048167 | 1.793691  |
| H  | 1.567229  | 1.312570  | 2.356154  |
| H  | 0.189726  | 2.415165  | 2.557158  |
| H  | 1.325834  | 1.523703  | -0.147778 |
| H  | 0.115895  | 2.808659  | 0.103756  |
| H  | 1.846182  | 4.197812  | 1.266818  |
| H  | 3.004233  | 2.870361  | 1.131075  |
| H  | 3.412181  | 4.576740  | -0.658676 |
| H  | 2.956324  | 3.007157  | -1.348937 |
| H  | 1.773679  | 4.332180  | -1.284045 |
| P  | 2.869986  | -1.121901 | -0.440644 |
| F  | 2.852043  | -0.148289 | 0.916181  |
| F  | 1.267368  | -0.723100 | -0.677781 |
| F  | 2.814352  | -2.084033 | -1.732841 |
| F  | 4.405251  | -1.504574 | -0.140182 |
| F  | 2.350379  | -2.364905 | 0.533515  |
| F  | 3.297423  | 0.164985  | -1.334188 |
| Pd | -2.853469 | -0.931991 | -0.666376 |
| Pd | -1.719687 | 1.433833  | -0.516214 |

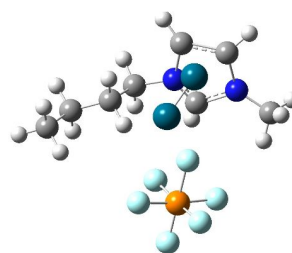

f2

*HF* = -1617.7933549

Zero-point correction = 0.244599

Cartesian coordinate:

|    |           |           |           |
|----|-----------|-----------|-----------|
| N  | -1.211225 | 1.569392  | 1.532727  |
| C  | -2.456378 | 1.146979  | 0.999727  |
| C  | -2.665405 | -0.168214 | 1.498923  |
| N  | -1.530355 | -0.459278 | 2.297166  |
| C  | -0.689440 | 0.571582  | 2.243577  |
| C  | -1.214960 | -1.762425 | 2.880296  |
| C  | -0.487336 | 2.793397  | 1.152846  |
| C  | 0.022042  | 2.759524  | -0.293003 |
| C  | 0.898980  | 3.975911  | -0.616841 |
| C  | 1.471115  | 3.906844  | -2.036838 |
| H  | -3.196226 | 1.900899  | 0.759622  |
| H  | -3.603124 | -0.655691 | 1.737864  |
| H  | -0.140372 | -1.816534 | 3.055256  |
| H  | -1.767672 | -1.908037 | 3.813468  |
| H  | -1.486971 | -2.539180 | 2.162860  |
| H  | 0.319516  | 0.559135  | 2.625746  |
| H  | 0.353205  | 2.885448  | 1.844911  |
| H  | -1.161615 | 3.640851  | 1.322836  |
| H  | 0.602430  | 1.844615  | -0.431183 |
| H  | -0.832502 | 2.714851  | -0.981151 |
| H  | 0.321993  | 4.903594  | -0.489482 |
| H  | 1.727273  | 4.019601  | 0.103425  |
| H  | 2.106785  | 4.773228  | -2.250536 |
| H  | 2.076635  | 3.002213  | -2.163466 |
| H  | 0.671386  | 3.884963  | -2.787514 |
| P  | 2.325816  | -0.601630 | 0.627401  |
| F  | 2.069015  | 0.889685  | 1.294130  |
| F  | 2.558774  | 0.104466  | -0.822141 |
| F  | 2.458154  | -2.073630 | -0.034436 |
| F  | 1.946118  | -1.265267 | 2.083307  |
| F  | 0.662044  | -0.646281 | 0.268409  |
| F  | 3.885052  | -0.539595 | 0.994993  |
| Pd | -2.227984 | -0.282288 | -0.590282 |
| Pd | -0.014865 | -1.316022 | -1.878705 |

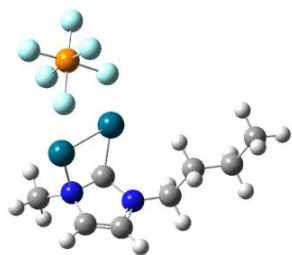

f3

*HF* = -1617.8006883

Zero-point correction = 0.243804

Cartesian coordinate:

|    |           |           |           |
|----|-----------|-----------|-----------|
| N  | -2.897809 | -0.883475 | 0.037912  |
| C  | -2.933061 | -1.783167 | -0.994351 |
| C  | -1.895819 | -2.649694 | -0.899348 |
| N  | -1.091215 | -2.281657 | 0.227871  |
| C  | -1.729716 | -1.088902 | 0.830254  |
| C  | -0.737761 | -3.373099 | 1.176552  |
| C  | -3.842126 | 0.204438  | 0.260980  |
| C  | -3.441426 | 1.539345  | -0.384936 |
| C  | -4.458126 | 2.654235  | -0.110894 |
| C  | -4.051879 | 3.991646  | -0.739325 |
| H  | -3.697197 | -1.728141 | -1.757535 |
| H  | -1.636962 | -3.503630 | -1.505254 |
| H  | -0.099994 | -2.965113 | 1.961700  |
| H  | -1.649616 | -3.801858 | 1.608415  |
| H  | -0.188886 | -4.148107 | 0.638380  |
| H  | -1.938089 | -1.219490 | 1.902897  |
| H  | -3.949112 | 0.330760  | 1.346254  |
| H  | -4.815011 | -0.125574 | -0.121688 |
| H  | -2.449142 | 1.827693  | -0.000666 |
| H  | -3.319473 | 1.395714  | -1.466946 |
| H  | -5.443678 | 2.352393  | -0.493871 |
| H  | -4.576496 | 2.780168  | 0.974817  |
| H  | -4.793462 | 4.769141  | -0.526458 |
| H  | -3.085815 | 4.334180  | -0.350198 |
| H  | -3.959325 | 3.906043  | -1.828462 |
| P  | 2.958471  | 1.018935  | -0.054738 |
| F  | 1.419469  | 1.706433  | 0.127639  |
| F  | 2.264283  | -0.090121 | -1.173146 |
| F  | 4.373055  | 0.288416  | -0.265844 |
| F  | 3.541801  | 2.065674  | 1.012658  |
| F  | 2.559396  | -0.034628 | 1.133767  |
| F  | 3.202346  | 2.011970  | -1.293833 |
| Pd | -0.410581 | 0.434660  | 0.749967  |
| Pd | 0.659379  | -1.474459 | -0.578783 |

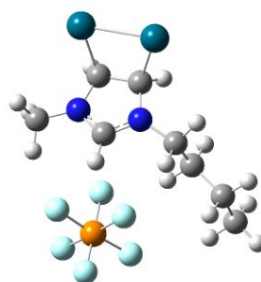

f4

*HF* = -1617.8084551

Cartesian coordinate:

|    |           |           |           |
|----|-----------|-----------|-----------|
| N  | 0.214197  | 0.732755  | -0.232900 |
| C  | 1.362207  | 0.698810  | 0.622025  |
| C  | 1.566678  | -0.731249 | 0.920593  |
| N  | 0.514431  | -1.396655 | 0.214349  |
| C  | -0.219994 | -0.505035 | -0.441010 |
| C  | 0.192856  | -2.822470 | 0.289638  |
| C  | -0.545614 | 1.940756  | -0.620223 |
| C  | -1.499194 | 2.397580  | 0.491126  |
| C  | -2.495298 | 3.453135  | -0.008416 |
| C  | -3.560655 | 3.772801  | 1.045551  |
| H  | 1.355085  | 1.430000  | 1.436184  |
| H  | 1.696936  | -1.058343 | 1.958299  |
| H  | -0.837916 | -2.956778 | -0.041201 |
| H  | 0.877110  | -3.405703 | -0.332659 |
| H  | 0.282056  | -3.144839 | 1.330829  |
| H  | -1.076954 | -0.753924 | -1.050092 |
| H  | -1.118056 | 1.675434  | -1.510298 |
| H  | 0.180818  | 2.712081  | -0.893348 |
| H  | -2.054893 | 1.524305  | 0.840025  |
| H  | -0.924514 | 2.791397  | 1.341928  |
| H  | -1.964151 | 4.368871  | -0.306664 |
| H  | -2.991645 | 3.062356  | -0.905721 |
| H  | -4.259440 | 4.534012  | 0.681300  |
| H  | -4.134206 | 2.870385  | 1.283090  |
| H  | -3.109945 | 4.148573  | 1.972863  |
| P  | -3.703857 | -0.977279 | -0.147349 |
| F  | -2.961448 | 0.155105  | -1.124143 |
| F  | -2.475405 | -0.747436 | 0.953938  |
| F  | -4.345991 | -2.102790 | 0.811986  |
| F  | -4.836772 | -1.196470 | -1.270826 |
| F  | -2.739585 | -2.125737 | -0.875426 |
| F  | -4.545098 | 0.210254  | 0.566829  |
| Pd | 3.035355  | 1.318155  | -0.384441 |
| Pd | 3.418340  | -1.219321 | 0.192672  |



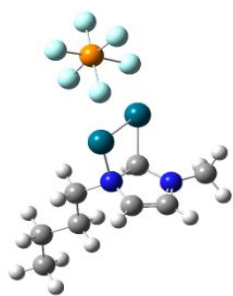

f5

HF=-1617.7972908

Cartesian coordinate:

|    |           |           |           |
|----|-----------|-----------|-----------|
| N  | 1.874956  | -0.040737 | 0.549631  |
| C  | 2.425577  | 0.540941  | 1.735879  |
| C  | 2.558977  | 1.876191  | 1.541953  |
| N  | 2.181271  | 2.208408  | 0.269062  |
| C  | 1.675265  | 1.063572  | -0.414951 |
| C  | 2.128684  | 3.555544  | -0.270397 |
| C  | 2.518022  | -1.291708 | 0.025682  |
| C  | 3.999259  | -1.131148 | -0.331260 |
| C  | 4.604652  | -2.448343 | -0.839065 |
| C  | 6.086836  | -2.315886 | -1.204582 |
| H  | 2.669920  | -0.071433 | 2.589601  |
| H  | 2.873160  | 2.632391  | 2.248063  |
| H  | 2.257625  | 3.512423  | -1.356421 |
| H  | 1.174998  | 4.048484  | -0.051207 |
| H  | 2.945731  | 4.146398  | 0.154036  |
| H  | 2.161873  | 0.876522  | -1.384132 |
| H  | 1.928340  | -1.603570 | -0.840275 |
| H  | 2.391465  | -2.056351 | 0.798562  |
| H  | 4.114695  | -0.355845 | -1.100860 |
| H  | 4.552486  | -0.783191 | 0.550773  |
| H  | 4.484241  | -3.223873 | -0.070023 |
| H  | 4.039608  | -2.795295 | -1.714930 |
| H  | 6.491043  | -3.269325 | -1.560992 |
| H  | 6.235465  | -1.573277 | -1.997756 |
| H  | 6.683085  | -2.002855 | -0.339009 |
| Pd | -0.288977 | 1.145685  | -0.875976 |
| Pd | -0.094676 | -0.489689 | 1.081568  |
| P  | -3.260170 | -0.633343 | -0.204460 |
| F  | -3.825800 | -2.039853 | 0.327041  |
| F  | -4.382508 | 0.200104  | 0.587117  |
| F  | -2.584173 | 0.838602  | -0.697261 |
| F  | -1.999189 | -1.384961 | -0.931306 |
| F  | -4.122406 | -0.681577 | -1.556934 |
| F  | -2.289300 | -0.535156 | 1.215102  |

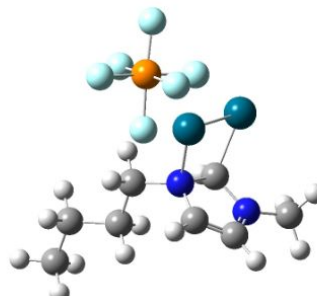

f6

HF=-1617.7911301

Cartesian coordinate:

|    |           |           |           |
|----|-----------|-----------|-----------|
| N  | -1.466096 | 0.398441  | 0.435141  |
| C  | -1.592550 | 0.428800  | 1.862648  |
| C  | -2.416291 | -0.576190 | 2.240912  |
| N  | -2.895078 | -1.236423 | 1.137189  |
| C  | -2.276195 | -0.728037 | -0.036593 |
| C  | -3.692825 | -2.448654 | 1.166132  |
| C  | -1.590714 | 1.701978  | -0.304219 |
| C  | -2.933799 | 2.406512  | -0.092415 |
| C  | -2.998487 | 3.735684  | -0.859910 |
| C  | -4.330580 | 4.466937  | -0.663403 |
| H  | -1.067539 | 1.169941  | 2.444494  |
| H  | -2.681808 | -0.891729 | 3.240274  |
| H  | -4.293897 | -2.507662 | 0.253494  |
| H  | -3.068429 | -3.347466 | 1.234947  |
| H  | -4.368725 | -2.412587 | 2.025137  |
| H  | -2.977775 | -0.458054 | -0.837383 |
| H  | -1.416510 | 1.476323  | -1.359472 |
| H  | -0.761946 | 2.329978  | 0.035657  |
| H  | -3.754426 | 1.753764  | -0.421110 |
| H  | -3.086556 | 2.588977  | 0.979130  |
| H  | -2.172473 | 4.382469  | -0.534629 |
| H  | -2.836487 | 3.546980  | -1.929948 |
| H  | -4.346917 | 5.409853  | -1.220160 |
| H  | -5.173856 | 3.858629  | -1.012431 |
| H  | -4.503104 | 4.700673  | 0.394039  |
| Pd | -1.066827 | -2.037467 | -1.020020 |
| Pd | 0.461546  | -0.278801 | 0.151833  |
| P  | 3.477010  | 0.564272  | 0.077483  |
| F  | 4.581808  | -0.116297 | -0.867428 |
| F  | 4.279089  | 1.945185  | 0.221686  |
| F  | 4.139743  | -0.061343 | 1.404554  |
| F  | 2.655363  | 1.110641  | -1.223942 |
| F  | 2.225285  | 1.166943  | 1.029346  |
| F  | 2.531503  | -0.886478 | -0.053427 |

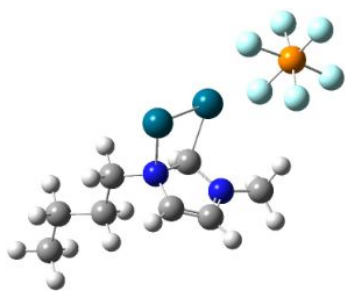

f7

$HF = -1617.7880308$

*Cartesian coordinate:*

|    |           |           |           |
|----|-----------|-----------|-----------|
| N  | -2.175242 | 0.223140  | 0.441250  |
| C  | -2.512792 | 0.251952  | 1.829417  |
| C  | -1.649442 | -0.556904 | 2.495170  |
| N  | -0.796772 | -1.163580 | 1.616406  |
| C  | -1.044514 | -0.696128 | 0.299343  |
| C  | 0.280577  | -2.092119 | 1.955219  |
| C  | -3.295434 | 0.083825  | -0.548987 |
| C  | -4.124277 | -1.193167 | -0.373407 |
| C  | -5.259146 | -1.273092 | -1.405777 |
| C  | -6.105480 | -2.541716 | -1.256034 |
| H  | -3.319501 | 0.869001  | 2.192222  |
| H  | -1.565222 | -0.723770 | 3.560027  |
| H  | 0.330645  | -2.876611 | 1.194426  |
| H  | 1.246966  | -1.583775 | 1.990048  |
| H  | 0.053703  | -2.546972 | 2.922467  |
| H  | -1.203733 | -1.484324 | -0.450576 |
| H  | -2.839682 | 0.129574  | -1.541220 |
| H  | -3.927919 | 0.969586  | -0.436463 |
| H  | -3.476194 | -2.073943 | -0.474339 |
| H  | -4.540764 | -1.223362 | 0.641409  |
| H  | -5.903473 | -0.388268 | -1.307366 |
| H  | -4.834344 | -1.232580 | -2.418137 |
| H  | -6.906116 | -2.570489 | -2.002722 |
| H  | -5.495334 | -3.443404 | -1.386115 |
| H  | -6.570943 | -2.594048 | -0.264510 |
| Pd | 0.549800  | 0.256717  | -0.428261 |
| Pd | -1.258348 | 2.111287  | 0.085086  |
| P  | 3.601076  | -0.496328 | -0.267441 |
| F  | 2.737896  | 0.800860  | -0.946704 |
| F  | 2.242715  | -1.449021 | -0.600166 |
| F  | 2.882650  | -0.124045 | 1.173328  |
| F  | 4.321623  | -1.769794 | 0.401004  |
| F  | 4.820274  | 0.494955  | 0.058915  |
| F  | 4.172193  | -0.844368 | -1.730234 |

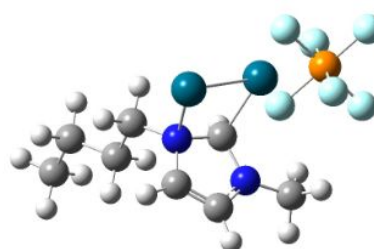

f8

$HF = -1617.7855287$

*Cartesian coordinate:*

|    |           |           |           |
|----|-----------|-----------|-----------|
| N  | 2.043669  | -0.049009 | 0.342650  |
| C  | 2.723467  | -0.319441 | 1.569115  |
| C  | 1.814211  | -0.274461 | 2.574861  |
| N  | 0.582897  | 0.061938  | 2.076409  |
| C  | 0.650076  | 0.191585  | 0.677338  |
| C  | -0.625108 | 0.296868  | 2.867419  |
| C  | 2.680389  | 0.899789  | -0.632658 |
| C  | 2.883325  | 2.311430  | -0.072972 |
| C  | 3.540937  | 3.236935  | -1.107941 |
| C  | 3.752770  | 4.658428  | -0.576375 |
| H  | 3.779909  | -0.536350 | 1.583010  |
| H  | 1.953075  | -0.486540 | 3.625679  |
| H  | -1.328804 | 0.873716  | 2.269082  |
| H  | -1.100061 | -0.649145 | 3.143591  |
| H  | -0.355784 | 0.852780  | 3.770173  |
| H  | 0.198094  | 1.093073  | 0.252249  |
| H  | 2.037568  | 0.911030  | -1.516149 |
| H  | 3.637718  | 0.457366  | -0.924245 |
| H  | 1.915186  | 2.731736  | 0.228964  |
| H  | 3.504321  | 2.262452  | 0.830853  |
| H  | 4.506584  | 2.811761  | -1.416018 |
| H  | 2.917302  | 3.272663  | -2.011431 |
| H  | 4.222948  | 5.294794  | -1.333608 |
| H  | 2.799906  | 5.122067  | -0.295532 |
| H  | 4.399098  | 4.659400  | 0.309633  |
| P  | -3.291392 | 0.724085  | -0.238328 |
| F  | -2.380051 | 0.175146  | -1.517572 |
| F  | -1.974529 | 1.622984  | 0.238193  |
| F  | -4.079843 | 1.211397  | 1.082893  |
| F  | -4.505097 | -0.234326 | -0.687910 |
| F  | -2.644121 | -0.558616 | 0.660804  |
| F  | -3.828597 | 1.955871  | -1.119960 |
| Pd | -0.512379 | -1.137181 | -0.312225 |
| Pd | 1.992545  | -1.975459 | -0.591590 |

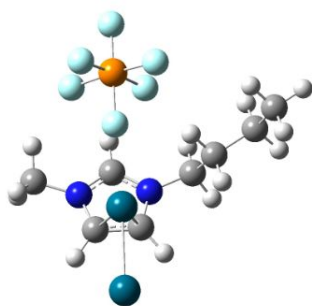

f9

HF=-1617.7854566

Cartesian coordinate:

|    |           |           |           |
|----|-----------|-----------|-----------|
| N  | 0.124115  | 0.501311  | 1.895051  |
| C  | -1.211782 | 0.362728  | 1.468101  |
| C  | -1.439384 | -1.030256 | 1.337136  |
| N  | -0.224082 | -1.652935 | 1.686268  |
| C  | 0.678385  | -0.710122 | 1.960051  |
| C  | 0.065581  | -3.085002 | 1.573633  |
| C  | 0.862498  | 1.774611  | 1.998466  |
| C  | 1.028965  | 2.470349  | 0.642055  |
| C  | 2.005232  | 3.651191  | 0.722146  |
| C  | 2.261382  | 4.268827  | -0.656715 |
| H  | -1.930237 | 1.143515  | 1.681381  |
| H  | -2.372021 | -1.571019 | 1.439138  |
| H  | 1.103179  | -3.202640 | 1.260784  |
| H  | -0.117492 | -3.588125 | 2.527600  |
| H  | -0.584216 | -3.505736 | 0.804816  |
| H  | 1.730688  | -0.893095 | 2.108982  |
| H  | 1.840699  | 1.527963  | 2.414692  |
| H  | 0.329730  | 2.406003  | 2.718571  |
| H  | 1.410405  | 1.738383  | -0.071597 |
| H  | 0.049650  | 2.813411  | 0.280638  |
| H  | 1.625075  | 4.415443  | 1.415566  |
| H  | 2.957038  | 3.292136  | 1.135636  |
| H  | 2.969333  | 5.102352  | -0.591640 |
| H  | 2.680227  | 3.518614  | -1.336709 |
| H  | 1.334345  | 4.651141  | -1.101973 |
| P  | 3.027255  | -0.810083 | -0.647385 |
| F  | 3.083716  | 0.143883  | 0.714367  |
| F  | 1.355021  | -0.605998 | -0.648527 |
| F  | 2.884911  | -1.762678 | -1.940853 |
| F  | 4.621917  | -1.007012 | -0.587097 |
| F  | 2.799863  | -2.108948 | 0.356300  |
| F  | 3.152866  | 0.521674  | -1.564834 |
| Pd | -1.317323 | -0.162477 | -0.635637 |
| Pd | -3.994098 | 0.152086  | -0.479097 |

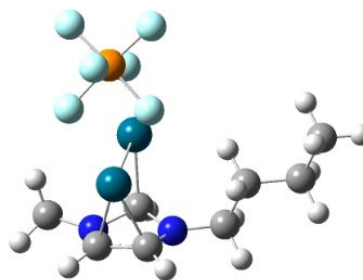

f10

HF=-1617.7774573

S=3

Cartesian coordinate:

|    |           |           |           |
|----|-----------|-----------|-----------|
| N  | 0.000000  | 0.000000  | 0.000000  |
| C  | 0.000000  | 0.000000  | 1.435142  |
| C  | 1.421858  | 0.000000  | 1.819982  |
| N  | 2.120547  | -0.089312 | 0.564699  |
| C  | 1.250203  | -0.129948 | -0.433939 |
| C  | 3.565097  | -0.240020 | 0.392499  |
| C  | -1.194915 | -0.132963 | -0.849521 |
| C  | -1.797182 | -1.542648 | -0.805028 |
| C  | -2.888601 | -1.757246 | -1.861140 |
| C  | -3.360940 | -3.214178 | -1.902359 |
| H  | -0.696828 | 0.699675  | 1.903493  |
| H  | 1.800747  | 0.777942  | 2.494827  |
| H  | 3.755152  | -0.600005 | -0.619234 |
| H  | 4.070942  | 0.715739  | 0.565883  |
| H  | 3.931199  | -0.984358 | 1.102268  |
| H  | 1.517387  | -0.295677 | -1.467160 |
| H  | -0.879575 | 0.095381  | -1.868531 |
| H  | -1.913226 | 0.629514  | -0.526927 |
| H  | -0.993160 | -2.261504 | -0.971473 |
| H  | -2.219451 | -1.725858 | 0.206504  |
| H  | -3.737306 | -1.082268 | -1.679831 |
| H  | -2.469732 | -1.491811 | -2.840506 |
| H  | -4.134266 | -3.357246 | -2.664902 |
| H  | -2.520258 | -3.874888 | -2.140609 |
| H  | -3.781713 | -3.527230 | -0.937940 |
| P  | 1.574623  | -2.899309 | -2.542807 |
| F  | 0.558257  | -1.603389 | -2.819950 |
| F  | 1.270119  | -2.715985 | -0.912675 |
| F  | 2.581283  | -4.113818 | -2.210890 |
| F  | 1.864494  | -3.004194 | -4.123544 |
| F  | 2.810104  | -1.800235 | -2.370592 |
| F  | 0.297553  | -3.897278 | -2.644538 |
| Pd | 1.193596  | -1.513736 | -1.188619 |
| Pd | 2.052475  | -1.872642 | 0.330000  |

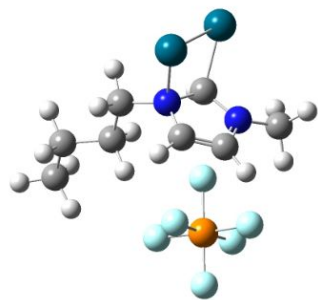

f11

HF=-1617.7748618

Cartesian coordinate:

|    |           |           |           |
|----|-----------|-----------|-----------|
| N  | 0.863660  | 0.614027  | 0.428991  |
| C  | 0.269187  | 0.085901  | 1.588641  |
| C  | -0.070306 | -1.215840 | 1.338523  |
| N  | 0.271131  | -1.530079 | 0.065164  |
| C  | 0.861103  | -0.431383 | -0.567765 |
| C  | -0.149031 | -2.746549 | -0.631312 |
| C  | 0.571441  | 2.036642  | 0.018905  |
| C  | -0.860571 | 2.239053  | -0.483207 |
| C  | -1.186439 | 3.727184  | -0.675488 |
| C  | -2.576915 | 3.916738  | -1.294865 |
| H  | 0.040505  | 0.710184  | 2.437106  |
| H  | -0.588865 | -1.916531 | 1.973058  |
| H  | -0.121125 | -2.555366 | -1.705515 |
| H  | 0.522720  | -3.575984 | -0.393232 |
| H  | -1.174606 | -2.966227 | -0.333201 |
| H  | 0.426231  | -0.154178 | -1.534456 |
| H  | 1.315224  | 2.300785  | -0.736863 |
| H  | 0.768423  | 2.644947  | 0.907204  |
| H  | -0.999875 | 1.706230  | -1.430300 |
| H  | -1.569625 | 1.791334  | 0.216209  |
| H  | -1.141321 | 4.236377  | 0.297949  |
| H  | -0.426984 | 4.207732  | -1.310220 |
| H  | -2.856586 | 4.975735  | -1.322167 |
| H  | -2.602022 | 3.534929  | -2.322151 |
| H  | -3.335666 | 3.367246  | -0.728304 |
| Pd | 2.773904  | -0.804311 | -1.202549 |
| Pd | 2.881042  | 0.549090  | 1.119355  |
| P  | -3.475169 | -0.662403 | 0.149641  |
| F  | -2.824362 | -2.054871 | 0.781024  |
| F  | -2.119914 | -0.531537 | -0.812281 |
| F  | -2.673297 | 0.185811  | 1.323779  |
| F  | -4.756867 | -0.803460 | 1.119995  |
| F  | -4.024281 | 0.737476  | -0.469348 |
| F  | -4.195811 | -1.521097 | -1.015668 |

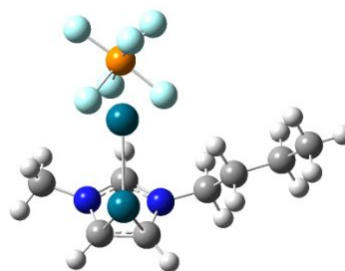

f12

HF=-1617.7745241

S=3

Cartesian coordinate:

|    |           |           |           |
|----|-----------|-----------|-----------|
| N  | 0.000000  | 0.000000  | 0.000000  |
| C  | 0.000000  | 0.000000  | 1.411809  |
| C  | 1.364469  | 0.000000  | 1.802299  |
| N  | 2.106313  | -0.007971 | 0.601499  |
| C  | 1.261318  | -0.057457 | -0.427560 |
| C  | 3.559161  | -0.155186 | 0.493693  |
| C  | -1.181741 | -0.206966 | -0.857779 |
| C  | -1.749529 | -1.627563 | -0.738278 |
| C  | -2.748476 | -1.944580 | -1.858676 |
| C  | -3.196051 | -3.409683 | -1.819703 |
| H  | -0.851481 | 0.416995  | 1.935111  |
| H  | 1.811569  | 0.426842  | 2.691667  |
| H  | 3.785033  | -0.647159 | -0.452540 |
| H  | 4.048186  | 0.821781  | 0.554194  |
| H  | 3.903728  | -0.791677 | 1.310635  |
| H  | 1.552510  | -0.226516 | -1.452413 |
| H  | -0.852243 | -0.022741 | -1.881656 |
| H  | -1.920829 | 0.556672  | -0.590484 |
| H  | -0.916180 | -2.329606 | -0.797421 |
| H  | -2.225905 | -1.753134 | 0.244240  |
| H  | -3.620301 | -1.277027 | -1.796419 |
| H  | -2.262141 | -1.747571 | -2.822840 |
| H  | -3.904760 | -3.628543 | -2.626061 |
| H  | -2.329992 | -4.070007 | -1.938437 |
| H  | -3.685767 | -3.654542 | -0.868595 |
| P  | 1.748717  | -3.067073 | -2.154676 |
| F  | 0.706781  | -1.845260 | -2.599175 |
| F  | 1.398032  | -2.711311 | -0.557393 |
| F  | 2.779772  | -4.204034 | -1.658050 |
| F  | 2.084602  | -3.346205 | -3.704246 |
| F  | 2.948472  | -1.920650 | -2.080107 |
| F  | 0.505104  | -4.110190 | -2.167009 |
| Pd | 0.502333  | -1.921344 | 2.260311  |
| Pd | 2.603840  | -2.086098 | 0.404134  |

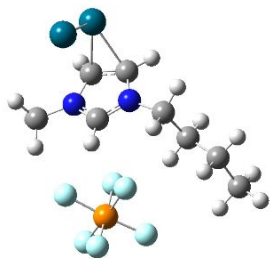

f13

HF=-1617.7699427

Cartesian coordinate:

|    |           |           |           |
|----|-----------|-----------|-----------|
| N  | 0.000000  | 0.000000  | 0.000000  |
| C  | 0.000000  | 0.000000  | 1.394067  |
| C  | 1.346561  | 0.000000  | 1.791222  |
| N  | 2.096474  | -0.014935 | 0.615033  |
| C  | 1.263688  | 0.011521  | -0.427627 |
| C  | 3.556547  | -0.055059 | 0.504794  |
| C  | -1.176037 | -0.160517 | -0.883587 |
| C  | -1.560991 | -1.636044 | -1.048721 |
| C  | -2.553471 | -1.842170 | -2.201254 |
| C  | -2.787744 | -3.329282 | -2.487333 |
| H  | -0.881788 | -0.297555 | 1.944033  |
| H  | 1.790522  | -0.305428 | 2.728776  |
| H  | 3.804806  | -0.406840 | -0.497485 |
| H  | 3.973113  | 0.939914  | 0.683617  |
| H  | 3.945559  | -0.758764 | 1.243920  |
| H  | 1.568119  | 0.000097  | -1.463022 |
| H  | -0.891818 | 0.260028  | -1.848938 |
| H  | -1.982340 | 0.447679  | -0.462906 |
| H  | -0.650276 | -2.200426 | -1.261135 |
| H  | -1.982151 | -2.020869 | -0.108842 |
| H  | -3.505962 | -1.338782 | -1.981125 |
| H  | -2.140591 | -1.369786 | -3.101654 |
| H  | -3.504016 | -3.464550 | -3.305161 |
| H  | -1.845963 | -3.807707 | -2.777275 |
| H  | -3.182532 | -3.851702 | -1.606825 |
| P  | 1.973544  | -2.239682 | -3.016488 |
| F  | 0.782811  | -1.066706 | -3.049545 |
| F  | 1.633400  | -2.453555 | -1.401656 |
| F  | 3.148480  | -3.337608 | -2.911786 |
| F  | 2.294592  | -1.947827 | -4.566971 |
| F  | 3.037264  | -1.036450 | -2.558947 |
| F  | 0.861591  | -3.358890 | -3.385206 |
| Pd | 1.094772  | 3.801685  | 0.503935  |
| Pd | 0.490653  | 2.059673  | 2.288167  |

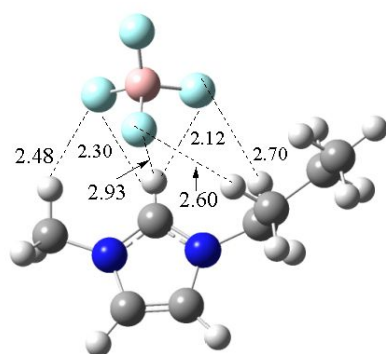

Sum of electronic and zero-point Energies=  
 -847.884985

Cartesian coordinate:

|   |           |           |           |
|---|-----------|-----------|-----------|
| N | 0.079366  | -1.706499 | 0.477622  |
| C | 0.415822  | -2.915111 | -0.103697 |
| C | 1.719788  | -2.827539 | -0.481843 |
| N | 2.158112  | -1.563807 | -0.130896 |
| C | 1.149172  | -0.907904 | 0.448859  |
| C | 3.506688  | -1.021195 | -0.337408 |
| C | -1.259745 | -1.307679 | 0.958707  |
| C | -2.177170 | -0.875976 | -0.187208 |
| C | -3.557081 | -0.450960 | 0.328448  |
| C | -4.501582 | -0.029775 | -0.800726 |
| H | -0.290010 | -3.723426 | -0.195800 |
| H | 2.364715  | -3.545138 | -0.960665 |
| H | 3.461562  | 0.058936  | -0.213863 |
| H | 4.195846  | -1.457806 | 0.386532  |
| H | 3.832180  | -1.258683 | -1.349798 |
| H | 1.178635  | 0.106861  | 0.812047  |
| H | -1.108061 | -0.488108 | 1.661471  |
| H | -1.669646 | -2.159236 | 1.506646  |
| H | -1.705323 | -0.043781 | -0.718975 |
| H | -2.287730 | -1.702966 | -0.898354 |
| H | -4.007475 | -1.275659 | 0.893809  |
| H | -3.437509 | 0.379576  | 1.033398  |
| H | -5.476745 | 0.268396  | -0.407157 |
| H | -4.093438 | 0.817373  | -1.359659 |
| H | -4.663862 | -0.849223 | -1.507731 |
| B | 0.633799  | 2.453006  | -0.011379 |
| F | 0.086807  | 1.888876  | 1.179294  |
| F | 2.002004  | 2.062038  | -0.081812 |
| F | -0.052532 | 1.926129  | -1.122848 |
| F | 0.530405  | 3.847051  | 0.025047  |

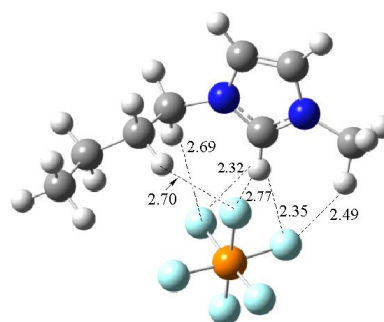

Sum of electronic and zero-point Energies=  
 -1364.088823

Cartesian coordinate:

|   |           |           |           |
|---|-----------|-----------|-----------|
| N | 2.062948  | 1.019182  | 0.435745  |
| C | 2.871659  | 1.808802  | -0.361651 |
| C | 2.160766  | 2.926743  | -0.669117 |
| N | 0.926256  | 2.801677  | -0.058681 |
| C | 0.894919  | 1.642478  | 0.602722  |
| C | -0.172449 | 3.773580  | -0.115887 |
| C | 2.389826  | -0.327721 | 0.947013  |
| C | 2.401252  | -1.380454 | -0.163053 |
| C | 2.722054  | -2.774351 | 0.389350  |
| C | 2.755473  | -3.845430 | -0.704162 |
| H | 3.870215  | 1.514257  | -0.637196 |
| H | 2.422277  | 3.788590  | -1.259927 |
| H | -1.094964 | 3.267388  | 0.160181  |
| H | 0.026849  | 4.599468  | 0.568116  |
| H | -0.257034 | 4.148860  | -1.135144 |
| H | 0.053806  | 1.258808  | 1.153586  |
| H | 1.637009  | -0.565927 | 1.698662  |
| H | 3.359821  | -0.258326 | 1.445463  |
| H | 1.423717  | -1.387901 | -0.654193 |
| H | 3.144776  | -1.106362 | -0.920319 |
| H | 3.688090  | -2.749543 | 0.907503  |
| H | 1.972871  | -3.044436 | 1.142165  |
| H | 2.983125  | -4.828582 | -0.284389 |
| H | 1.791237  | -3.915803 | -1.215912 |
| H | 3.517435  | -3.619689 | -1.456507 |
| P | -2.121764 | -0.515688 | -0.031818 |
| F | -0.987103 | -0.813572 | 1.138657  |
| F | -0.907754 | -0.088667 | -1.062151 |
| F | -3.228694 | -0.183795 | -1.185944 |
| F | -3.309009 | -0.914034 | 1.018622  |
| F | -2.191947 | 1.057541  | 0.491301  |
| F | -2.017515 | -2.063403 | -0.536658 |

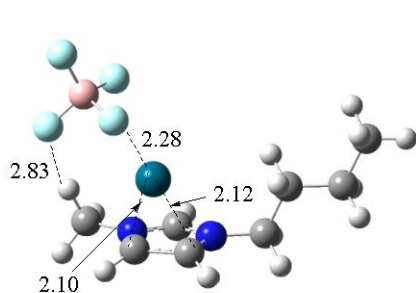

**c1 in solution**

*Sum of electronic and zero-point Energies= -974.641466*

*Cartesian coordinate:*

|    |           |           |           |
|----|-----------|-----------|-----------|
| C  | 1.166716  | 1.934928  | 1.051365  |
| N  | 1.858792  | 1.357650  | 0.075407  |
| C  | 1.055290  | 1.313696  | -1.099107 |
| C  | -0.163893 | 1.957703  | -0.747106 |
| N  | -0.027686 | 2.325833  | 0.614159  |
| C  | 3.212060  | 0.799880  | 0.197285  |
| C  | 3.221562  | -0.725453 | 0.334424  |
| C  | 4.647581  | -1.279638 | 0.431000  |
| C  | 4.680645  | -2.803590 | 0.576090  |
| C  | -1.090181 | 2.925007  | 1.420045  |
| F  | -2.327725 | -1.445215 | -0.678719 |
| B  | -3.049238 | -1.227949 | 0.573227  |
| F  | -4.099731 | -2.149040 | 0.620853  |
| F  | -2.155653 | -1.425398 | 1.630933  |
| F  | -3.532733 | 0.089811  | 0.572691  |
| H  | 1.564458  | 1.320335  | -2.058594 |
| H  | -0.825102 | 2.551444  | -1.371816 |
| H  | -1.918100 | 2.219596  | 1.507588  |
| H  | -0.698841 | 3.163665  | 2.408253  |
| H  | -1.434659 | 3.841162  | 0.937967  |
| H  | 1.510002  | 2.038335  | 2.070506  |
| H  | 3.681326  | 1.273186  | 1.063154  |
| H  | 3.767401  | 1.113553  | -0.690902 |
| H  | 2.650241  | -1.007889 | 1.225783  |
| H  | 2.705939  | -1.166504 | -0.524796 |
| H  | 5.212440  | -0.984921 | -0.461253 |
| H  | 5.159555  | -0.820254 | 1.284928  |
| H  | 5.708154  | -3.170195 | 0.642245  |
| H  | 4.152719  | -3.126470 | 1.478441  |
| H  | 4.206378  | -3.292872 | -0.279920 |
| Pd | -0.529338 | -0.086161 | -1.026532 |

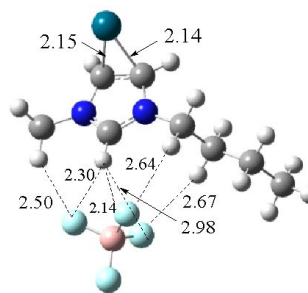

**c2 in solution**

*Sum of electronic and zero-point Energies= -974.634528*

*Cartesian coordinate:*

|    |           |           |           |
|----|-----------|-----------|-----------|
| C  | 0.050267  | -0.744228 | -0.048160 |
| N  | 0.358259  | 0.549518  | -0.061232 |
| C  | 1.558405  | 0.744822  | 0.657594  |
| C  | 1.946807  | -0.538920 | 1.117225  |
| N  | 0.952139  | -1.426850 | 0.652930  |
| C  | -0.473354 | 1.605195  | -0.665903 |
| C  | -1.381747 | 2.290260  | 0.358287  |
| C  | -2.231924 | 3.389797  | -0.288807 |
| C  | -3.144738 | 4.097332  | 0.716398  |
| C  | 0.929946  | -2.874099 | 0.866745  |
| F  | -3.376378 | -0.774173 | 0.888043  |
| B  | -3.311833 | -1.614782 | -0.238941 |
| F  | -4.581421 | -2.104709 | -0.569130 |
| F  | -2.770545 | -0.881244 | -1.335540 |
| F  | -2.426013 | -2.696126 | 0.033952  |
| H  | 1.754898  | 1.711633  | 1.109724  |
| H  | 2.507781  | -0.799269 | 2.009719  |
| H  | -0.058883 | -3.246103 | 0.604457  |
| H  | 1.690604  | -3.356589 | 0.250807  |
| H  | 1.128597  | -3.079694 | 1.919282  |
| H  | -0.801478 | -1.175076 | -0.551685 |
| H  | -1.071173 | 1.130590  | -1.444920 |
| H  | 0.205748  | 2.316947  | -1.140670 |
| H  | -2.032450 | 1.534738  | 0.809807  |
| H  | -0.771033 | 2.721253  | 1.160329  |
| H  | -1.575743 | 4.126208  | -0.768305 |
| H  | -2.840055 | 2.950241  | -1.087606 |
| H  | -3.742031 | 4.872512  | 0.229254  |
| H  | -3.834409 | 3.390293  | 1.186673  |
| H  | -2.563354 | 4.575008  | 1.511143  |
| Pd | 3.353404  | 0.148432  | -0.351769 |

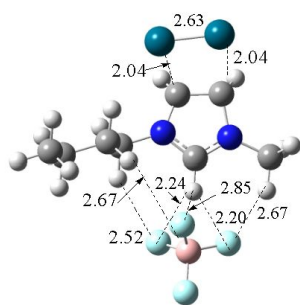

d1 in solution

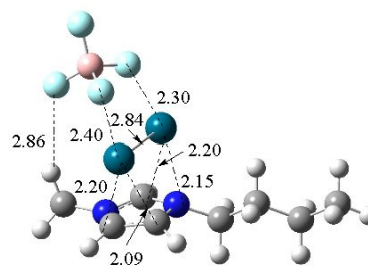

d2 in solution

Sum of electronic and zero-point Energies= -1101.393270

Total free energy in solution: with all non electrostatic terms  
 (a.u.) = -1064.421315

Cartesian coordinate:

|    |           |           |           |
|----|-----------|-----------|-----------|
| C  | 0.699539  | -1.051973 | 0.988382  |
| N  | 0.355361  | 0.191965  | 1.288660  |
| C  | -1.078817 | 0.295155  | 1.339670  |
| C  | -1.561793 | -1.072501 | 1.084155  |
| N  | -0.359790 | -1.838654 | 0.877856  |
| C  | 1.299100  | 1.304864  | 1.466464  |
| C  | 1.467495  | 2.157806  | 0.206699  |
| C  | 2.441116  | 3.319897  | 0.426984  |
| C  | 2.628134  | 4.181479  | -0.824810 |
| C  | -0.302712 | -3.275612 | 0.615751  |
| F  | 3.247606  | -0.588951 | -1.432281 |
| B  | 3.859643  | -1.439978 | -0.492089 |
| F  | 5.162856  | -1.765319 | -0.886154 |
| F  | 3.875728  | -0.793149 | 0.776244  |
| F  | 3.076907  | -2.624388 | -0.361404 |
| H  | -1.466980 | 0.866822  | 2.191804  |
| H  | -2.281321 | -1.536670 | 1.772212  |
| H  | 0.741082  | -3.571919 | 0.522280  |
| H  | -0.769823 | -3.816178 | 1.441888  |
| H  | -0.826347 | -3.505872 | -0.312390 |
| H  | 1.716933  | -1.380771 | 0.835899  |
| H  | 2.256434  | 0.867622  | 1.752940  |
| H  | 0.929033  | 1.905121  | 2.302537  |
| H  | 1.826081  | 1.518459  | -0.606147 |
| H  | 0.481970  | 2.548367  | -0.097503 |
| H  | 2.084469  | 3.945844  | 1.253800  |
| H  | 3.411042  | 2.916480  | 0.739599  |
| H  | 3.331487  | 4.997588  | -0.640086 |
| H  | 3.017093  | 3.586912  | -1.656597 |
| H  | 1.680573  | 4.625134  | -1.146166 |
| Pd | -2.730673 | -0.974788 | -0.582349 |
| Pd | -1.774092 | 1.443296  | -0.194752 |

Sum of electronic and zero-point Energies= -1101.381257

Total free energy in solution: with all non electrostatic terms  
 (a.u.) = -1065.619966

Cartesian coordinate:

|    |           |           |           |
|----|-----------|-----------|-----------|
| C  | -0.651955 | 1.413288  | -1.390871 |
| N  | -1.478637 | 0.888758  | -0.403288 |
| C  | -1.028886 | 1.446146  | 0.870911  |
| C  | 0.020425  | 2.341643  | 0.556270  |
| N  | 0.167335  | 2.353092  | -0.836759 |
| C  | -2.925151 | 0.628545  | -0.637846 |
| C  | -3.450010 | -0.550911 | 0.173857  |
| C  | -4.944919 | -0.791360 | -0.069807 |
| C  | -5.491251 | -1.972684 | 0.736735  |
| C  | 1.302836  | 2.944344  | -1.534635 |
| F  | 2.523837  | -1.064236 | 1.199446  |
| B  | 2.995794  | -1.332579 | -0.130292 |
| F  | 3.979791  | -2.310540 | -0.078668 |
| F  | 1.885466  | -1.839719 | -0.913063 |
| F  | 3.454006  | -0.153172 | -0.710214 |
| H  | -1.772386 | 1.550767  | 1.651819  |
| H  | 0.371290  | 3.194068  | 1.127852  |
| H  | 2.180003  | 2.296587  | -1.454906 |
| H  | 1.044253  | 3.083577  | -2.584787 |
| H  | 1.522282  | 3.915454  | -1.090003 |
| H  | -0.936060 | 1.444765  | -2.440093 |
| H  | -3.038503 | 0.440720  | -1.707267 |
| H  | -3.467921 | 1.548391  | -0.393224 |
| H  | -2.875609 | -1.444626 | -0.095598 |
| H  | -3.277607 | -0.374541 | 1.241162  |
| H  | -5.505964 | 0.115381  | 0.185052  |
| H  | -5.114831 | -0.968372 | -1.138322 |
| H  | -6.556309 | -2.122814 | 0.542764  |
| H  | -4.971516 | -2.900703 | 0.480281  |
| H  | -5.368052 | -1.808348 | 1.811495  |
| Pd | 0.718543  | 0.489436  | 1.506597  |
| Pd | -0.101312 | -0.673032 | -0.952459 |



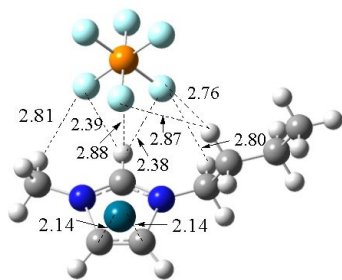

e1 in solution

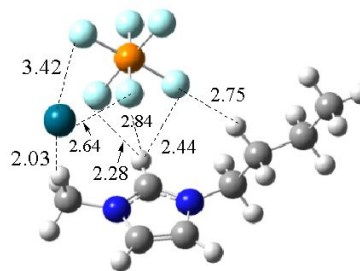

e2 in solution

Sum of electronic and zero-point Energies= -1490.839593

Cartesian coordinate:

|    |           |           |           |
|----|-----------|-----------|-----------|
| N  | -1.234910 | 0.416912  | 1.421182  |
| C  | -2.522239 | 0.073702  | 0.949390  |
| C  | -2.527788 | -1.339386 | 0.838070  |
| N  | -1.244621 | -1.760136 | 1.249499  |
| C  | -0.515759 | -0.692436 | 1.563775  |
| C  | -0.768921 | -3.142359 | 1.241804  |
| C  | -0.755757 | 1.785351  | 1.670586  |
| C  | -0.505178 | 2.570548  | 0.381053  |
| C  | -0.038649 | 4.000946  | 0.674204  |
| C  | 0.220341  | 4.809058  | -0.600257 |
| H  | -3.351882 | 0.739174  | 1.170677  |
| H  | -3.361805 | -2.025962 | 0.949884  |
| H  | 0.181843  | -3.192818 | 1.768233  |
| H  | -1.501456 | -3.774736 | 1.744812  |
| H  | -0.631256 | -3.481429 | 0.214374  |
| H  | 0.526564  | -0.719282 | 1.836260  |
| H  | 0.162661  | 1.698914  | 2.253019  |
| H  | -1.505951 | 2.279960  | 2.294318  |
| H  | 0.249666  | 2.043530  | -0.209292 |
| H  | -1.426120 | 2.594859  | -0.211847 |
| H  | -0.790602 | 4.513851  | 1.286038  |
| H  | 0.877296  | 3.965799  | 1.275430  |
| H  | 0.553865  | 5.822906  | -0.363925 |
| H  | 0.992997  | 4.337598  | -1.214594 |
| H  | -0.685979 | 4.889819  | -1.208415 |
| P  | 2.809438  | -0.534131 | -0.287221 |
| F  | 2.300463  | 0.539505  | 0.864488  |
| F  | 1.293809  | -0.535601 | -0.928480 |
| F  | 3.296956  | -1.616620 | -1.413797 |
| F  | 4.304778  | -0.537758 | 0.380758  |
| F  | 2.362312  | -1.772658 | 0.715811  |
| F  | 3.231437  | 0.705809  | -1.264586 |
| Pd | -2.645626 | -0.472050 | -1.118933 |

Sum of electronic and zero-point Energies= -1490.807592

Cartesian coordinate:

|    |           |           |           |
|----|-----------|-----------|-----------|
| N  | 1.919067  | -1.864518 | -0.755788 |
| C  | 1.714141  | -3.084831 | -0.137940 |
| C  | 0.408245  | -3.414357 | -0.326908 |
| N  | -0.165679 | -2.393146 | -1.061421 |
| C  | 0.767218  | -1.468421 | -1.303267 |
| C  | -1.586179 | -2.267421 | -1.391568 |
| C  | 3.172642  | -1.084030 | -0.746437 |
| C  | 3.474805  | -0.497630 | 0.633823  |
| C  | 4.768350  | 0.325284  | 0.625360  |
| C  | 5.092978  | 0.921978  | 1.997514  |
| H  | 2.505320  | -3.612558 | 0.367270  |
| H  | -0.154158 | -4.277192 | -0.011941 |
| H  | -2.135547 | -1.884155 | -0.496594 |
| H  | -1.701465 | -1.561780 | -2.210577 |
| H  | -1.975624 | -3.243457 | -1.677134 |
| H  | 0.604860  | -0.541297 | -1.825807 |
| H  | 3.052775  | -0.290588 | -1.484386 |
| H  | 3.972157  | -1.746864 | -1.086442 |
| H  | 2.634425  | 0.132589  | 0.939402  |
| H  | 3.559806  | -1.307968 | 1.366820  |
| H  | 5.601525  | -0.305591 | 0.293585  |
| H  | 4.677163  | 1.131538  | -0.111257 |
| H  | 6.018517  | 1.502336  | 1.964518  |
| H  | 4.293620  | 1.587254  | 2.336713  |
| H  | 5.217650  | 0.138212  | 2.750940  |
| P  | -0.428942 | 2.042988  | -0.467387 |
| F  | 1.129275  | 1.621759  | -0.817576 |
| F  | -0.561351 | 0.673451  | 0.462913  |
| F  | -1.983939 | 2.415536  | -0.133031 |
| F  | -0.289916 | 3.370271  | -1.408656 |
| F  | -0.921220 | 1.158468  | -1.777907 |
| F  | 0.079656  | 2.879213  | 0.836749  |
| Pd | -2.738182 | -0.700291 | 1.044571  |

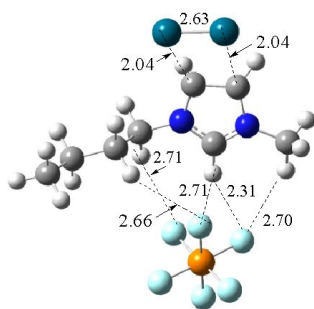

f1 in solution

Sum of electronic and zero-point Energies= -1617.598348

|    |           |           |           |
|----|-----------|-----------|-----------|
| N  | -0.379376 | 0.521317  | 1.521653  |
| C  | -1.796815 | 0.383983  | 1.314335  |
| C  | -2.019334 | -1.066208 | 1.193855  |
| N  | -0.701153 | -1.636351 | 1.308335  |
| C  | 0.192029  | -0.673149 | 1.472715  |
| C  | -0.392387 | -3.063631 | 1.254836  |
| C  | 0.331048  | 1.794376  | 1.701560  |
| C  | 0.521925  | 2.569857  | 0.396100  |
| C  | 1.237093  | 3.906056  | 0.621373  |
| C  | 1.422078  | 4.703255  | -0.672539 |
| H  | -2.419007 | 0.982698  | 1.990785  |
| H  | -2.778542 | -1.556734 | 1.818170  |
| H  | 0.669734  | -3.203614 | 1.447389  |
| H  | -0.977148 | -3.588901 | 2.012853  |
| H  | -0.632488 | -3.461157 | 0.268310  |
| H  | 1.256415  | -0.837679 | 1.534885  |
| H  | 1.298989  | 1.560889  | 2.147169  |
| H  | -0.242772 | 2.380777  | 2.425363  |
| H  | 1.089117  | 1.950940  | -0.305015 |
| H  | -0.466799 | 2.751102  | -0.059474 |
| H  | 0.672922  | 4.506289  | 1.345211  |
| H  | 2.216581  | 3.713969  | 1.074263  |
| H  | 1.939588  | 5.647125  | -0.482779 |
| H  | 2.011846  | 4.139436  | -1.401126 |
| H  | 0.458007  | 4.939074  | -1.133843 |
| P  | 3.572083  | -0.796289 | -0.375243 |
| F  | 3.215412  | 0.193695  | 0.903822  |
| F  | 2.090505  | -0.466504 | -1.012319 |
| F  | 3.898884  | -1.795549 | -1.627466 |
| F  | 5.029216  | -1.129613 | 0.291741  |
| F  | 2.903990  | -2.058670 | 0.464159  |
| F  | 4.212726  | 0.469930  | -1.184112 |
| Pd | -2.870610 | -1.375935 | -0.631320 |
| Pd | -2.330356 | 1.192860  | -0.479099 |

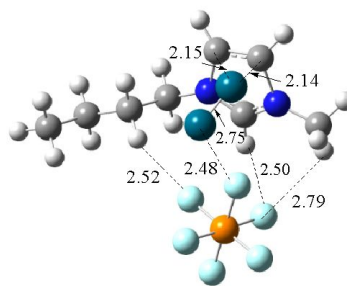

f2 in solution

Sum of electronic and zero-point Energies= -1617.570645

|    |           |           |           |
|----|-----------|-----------|-----------|
| N  | -1.843789 | 0.950660  | 1.523377  |
| C  | -2.608395 | -0.209235 | 1.255625  |
| C  | -1.925403 | -1.276111 | 1.891548  |
| N  | -0.794529 | -0.694511 | 2.508183  |
| C  | -0.774983 | 0.606970  | 2.235881  |
| C  | 0.252498  | -1.436456 | 3.206881  |
| C  | -2.145261 | 2.300876  | 1.026322  |
| C  | -2.031200 | 2.409036  | -0.496319 |
| C  | -2.360298 | 3.821539  | -0.991408 |
| C  | -2.240183 | 3.952158  | -2.512492 |
| H  | -3.672032 | -0.103395 | 1.064857  |
| H  | -2.337165 | -2.188935 | 2.311073  |
| H  | 0.916421  | -0.731275 | 3.702570  |
| H  | -0.207923 | -2.091531 | 3.947485  |
| H  | 0.824085  | -2.025486 | 2.489721  |
| H  | 0.029361  | 1.273493  | 2.502137  |
| H  | -1.450150 | 2.984380  | 1.518101  |
| H  | -3.155234 | 2.553257  | 1.363050  |
| H  | -1.014996 | 2.133574  | -0.792733 |
| H  | -2.709742 | 1.685705  | -0.960854 |
| H  | -3.376415 | 4.092681  | -0.680480 |
| H  | -1.687863 | 4.541142  | -0.509570 |
| H  | -2.475059 | 4.967831  | -2.841363 |
| H  | -1.225670 | 3.718124  | -2.848440 |
| H  | -2.926004 | 3.269324  | -3.023458 |
| P  | 2.599294  | 0.858636  | 0.292104  |
| F  | 1.283852  | 1.839010  | 0.194546  |
| F  | 2.741403  | 0.869646  | -1.334903 |
| F  | 3.885189  | -0.146768 | 0.412248  |
| F  | 2.417875  | 0.818212  | 1.931811  |
| F  | 1.589042  | -0.468524 | 0.185958  |
| F  | 3.579179  | 2.160250  | 0.417830  |
| Pd | -1.717294 | -1.488003 | -0.223717 |
| Pd | 0.575505  | -1.673096 | -1.728635 |

The Gaussian03 program allows the definition of an arbitrary solvent in the PCM model by specification of the parameters available for user input. The text pasted below is from <http://www.ccl.net/cgi-bin/ccl/message-new?2009+05+14+009>

---

- *From:* Madi <madi7sk[#]gmail.com>
  - *Subject:* CCL:G: Dioxane in PCM with G03
  - *Date:* Thu, 14 May 2009 17:17:29 -0400
- 

Sent to CCL by: Madi [madi7sk{:}gmail.com]

Hi,

I was trying to specify DMF using the PCM model in gaussian and was trouble getting it to work. I wrote to gaussian and their reply was very helpful. I am attaching it here for your reference. After you are done specifying all the parameters, make sure you deliberately leave a blank line.

Hope this helps

madi

\*\*\*\*\*

Regarding the specification of the DMF solvent, even though only the solvents listed in the Gaussian documentation of the SCRF keyword are available through the "Solvent=" option, a different solvent may be explicitly defined in the PCM input. However, please, note that it is not possible to input all parameters that define an arbitrary solvent. Specifically, one cannot define all of the terms necessary to calculate the non-electrostatic contributions. For this reason, there are two recommended alternatives:

1) Check in the list of solvents provided for the SCRF keyword whether there is a solvent similar enough to the one you would like to use in your calculation and provide this name in the "Solvent" option of the SCRF keyword. Then, add also the "Read" option to provide the modifications of "EPS", "RSOLV", "Density", and "VMOL". This way, you would be introducing the parameters for your desired

solvent, for the cases of parameters that are available for user input, and the program would be using the closest possible parameters for those other parameters that are not available for user input. (Note: if no solvent is specified, then the program defaults to water). So, probably, your best choice here would be to select a solvent with similar properties to DMF (such as Acetonitrile, DMSO, Acetone, Nitromethane) and then give the corresponding "EPS", "RSOLV", "Density", and "VMOL" parameters for DMF.

2) Alternatively, you can use the options "NoDis NoRep NoCav" in order to prevent the use of the parameters for the internally stored solvent (water, by default), so the non-electrostatic contributions to the solvation energy will not be computed. Note also that this is true if the default "UA0" radii are used, the electrostatic terms are then correctly computed this way. If this is not the case, and the UAHF or UAKS radii are used, then there is a dependency of the radius with the type of solvent so it would not be correct to use a modified water as a model for a solvent with properties different than water. Thus, if UAHF or UAKS radii are used, then one has to still do what it was explained in the previous paragraph, 1), (that is to use the "Solvent=" option to select, from the list of predefined solvents, a solvent similar to the one you are interested in). For the calculation of only the electrostatic part, you can define the solvent by defining the dielectric constant using the "EPS" option, the solvent radius using the "RSOLV" option, and the dielectric constant at infinite frequency using the "EPSINF". EPSINF is the dielectric constant at infinite frequency. It is an experimentally measured value. The value of EPSINF will not affect the results of ground-state energy calculation of  $\Delta G(\text{solv})$ , so you do not need to worry about getting a non-standard value. EPSINF is only necessary when performing excited state PCM calculations. Other than EPS, RSOLV usually makes the biggest difference in the result. As for choosing a value of RSOLV, our developers recommended a couple of references they use for this parameter:

\* O. Sinanoglu in "Molecular Interactions" Z. Ratajczack and Orville-Thomas eds, Wiley 1982 vol. 3 chap. 6

\* M.H. Abraham and A. Nasehzadeh J. Chem. Soc. Faraday Trans. 1 1981, 77, 340.

If the desired RSOLV parameter is not found there, the molar volume may give some hints for RSOLV values for new solvents, even though attention must be paid to the chemical nature of the solvent, because strong interactions modify, to some extent, the definition of the hard sphere analogue of the solvent molecular volume. Thus, although a simple approximation, the Stearn-Eyring formula (Stearn, Eyring J. Chem. Phys. 1937, 5, 113) can be used to derive a value for RSOLV, given the molar volume of the solvent. Finally, about other parameters, which only affect the non-electrostatic terms, the DENSITY is a "number density", i.e. number of particles per volume, and the units are Angstroms<sup>-3</sup>. Taking the density of the solvent in "g \* cm<sup>-3</sup>", divide by the molar weight of the solvent and multiply by Avogadro's number to transform the grams into number of particles, and, finally, divide by 10<sup>24</sup> to transform cm<sup>-3</sup> into Angstrom<sup>-3</sup>. Although the density and the molar volume are obviously related, these two quantities are used by the program to compute two different energy contributions and, unfortunately, they were introduced in the code as two independent parameters. Thus, the user needs to provide both the density ("DENSITY" PCM keyword) and the molar volume ("VMOL" PCM keyword) in order to set the desired modifications, so the two of them are consistent with each other. The units of the density are Angstrom<sup>-3</sup> while the units of the molar volume are cm<sup>3</sup>. So, from the value of the density of the solvent in "g \* cm<sup>-3</sup>", take the inverse of the density and then divide by the molar weight of the solvent in order to get the molar volume in cm<sup>3</sup>. Enter this parameter in your input file with the "VMOL" PCM keyword. The following input will use the standard parameters for the solvent given in "Solvent=<Solvent>", and modify those given in the additional PCM options (the values given below are not representative of any particular solvent and they are only given as an example of how to use these keywords):

```
%<Link 0 commands>
#P SCRF=(PCM,Solvent=<Solvent>,READ) <Method>/<BasisSet>
<Title>
<Charge Multiplicity>
```

<Coordinates>

EPS=6.0

RSOLV=1.6

DENSITY=0.045

VMOL=19.05
